# Supplementary material for: A European population in Minoan Bronze Age Crete
Source: PubMed Central journal article supplement — Nat Commun. 2013 May 14;4:1861–. doi: 10.1038/ncomms2871 (PMC3674256; doi:10.1038/ncomms2871), 2013-05-14
Supplement: ncomms2871-s1.pdf [file ncomms2871-s1.pdf]

## SUPPLEMENTARY INFORMATION

### A European population in early Bronze Age Crete

**Jeffery R Hughey, Peristera Paschou, Petros Drineas, Donald Mastropaolo, Dimitra M Lotakis, Patrick A Navas, Manolis Michalodimitrakis, John A Stamatoyannopoulos, & George Stamatoyannopoulos**

**Jeffery R Hughey**, Hartnell College, 411 Central Ave., Salinas, CA 93901, USA

**Peristera Paschou**, Department of Molecular Biology and Genetics, Democritus University of Thrace, Alexandroupolis, 68100 Greece

**Petros Drineas**, Department of Computer Science, Rensselaer Polytechnic Institute, Troy, New York, 12180, USA

**Donald Mastropaolo**, Division of Medical Genetics University of Washington, Seattle, WA 98195, USA

**Dimitra M Lotakis**, Division of Medical Genetics University of Washington, Seattle, WA 98195, USA

**Patrick A Navas**, Division of Medical Genetics University of Washington, Seattle, WA 98195, USA

**Manolis Michalodimitrakis**, Department of Forensic Medicine, University of Crete, Heraklion, Crete, 711 13, Greece

**John A Stamatoyannopoulos**, Departments of Medicine and Genome Sciences, University of Washington, Seattle, WA 98195, USA

**George Stamatoyannopoulos**, Departments of Medicine and Genome Sciences, University of Washington, Seattle, WA 98195, USA

## CONTENTS

**Supplementary Figures 1 to 3**

**Supplementary Tables 1 to 7**

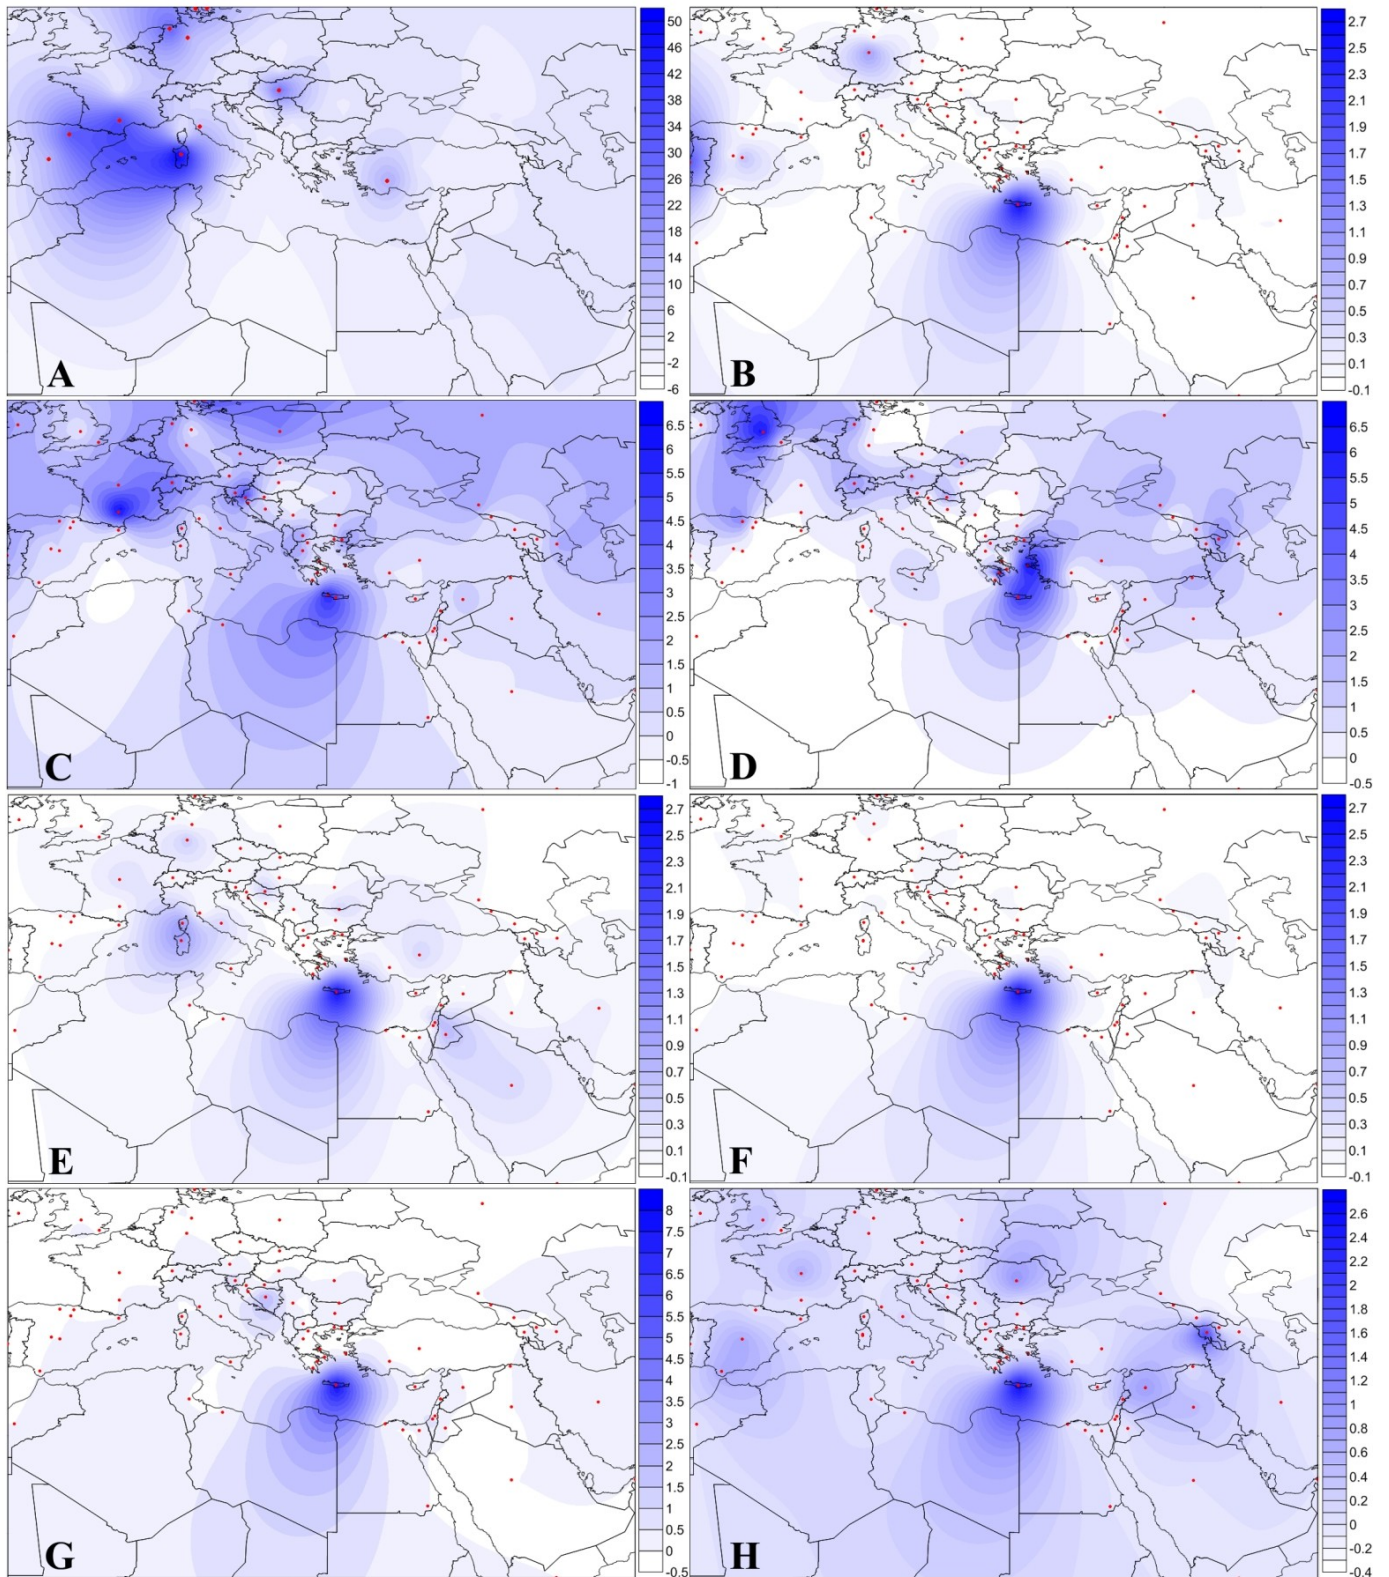

**Supplementary Figure S1. Geographical interpolation of shared mtDNA HVS-1 lineages.** The blue gradient represents the percentage of shared lineages for Minoan haplotypes. The higher percentages are represented in blue and the lower are in white. Six of the 17 Minoan lineages are private and are not shown in suppl. Figures 1 and 2 (haplotypes 2, 3, 9, 15, 19, 21). Crosses denote the location of populations used in this analysis. **A**, sharing with ancient populations; **B**, haplotype 1 shared with 3 populations; **C**, haplotype 4 shared with 40 populations; **D**, haplotype 5 shared with 37 populations; **E**, haplotype 6 shared with 12 populations; **F**, haplotype 7 shared with 1 population; **G**, haplotype 8 shared with 8 populations; **H**, haplotype 10 shared with 10 populations

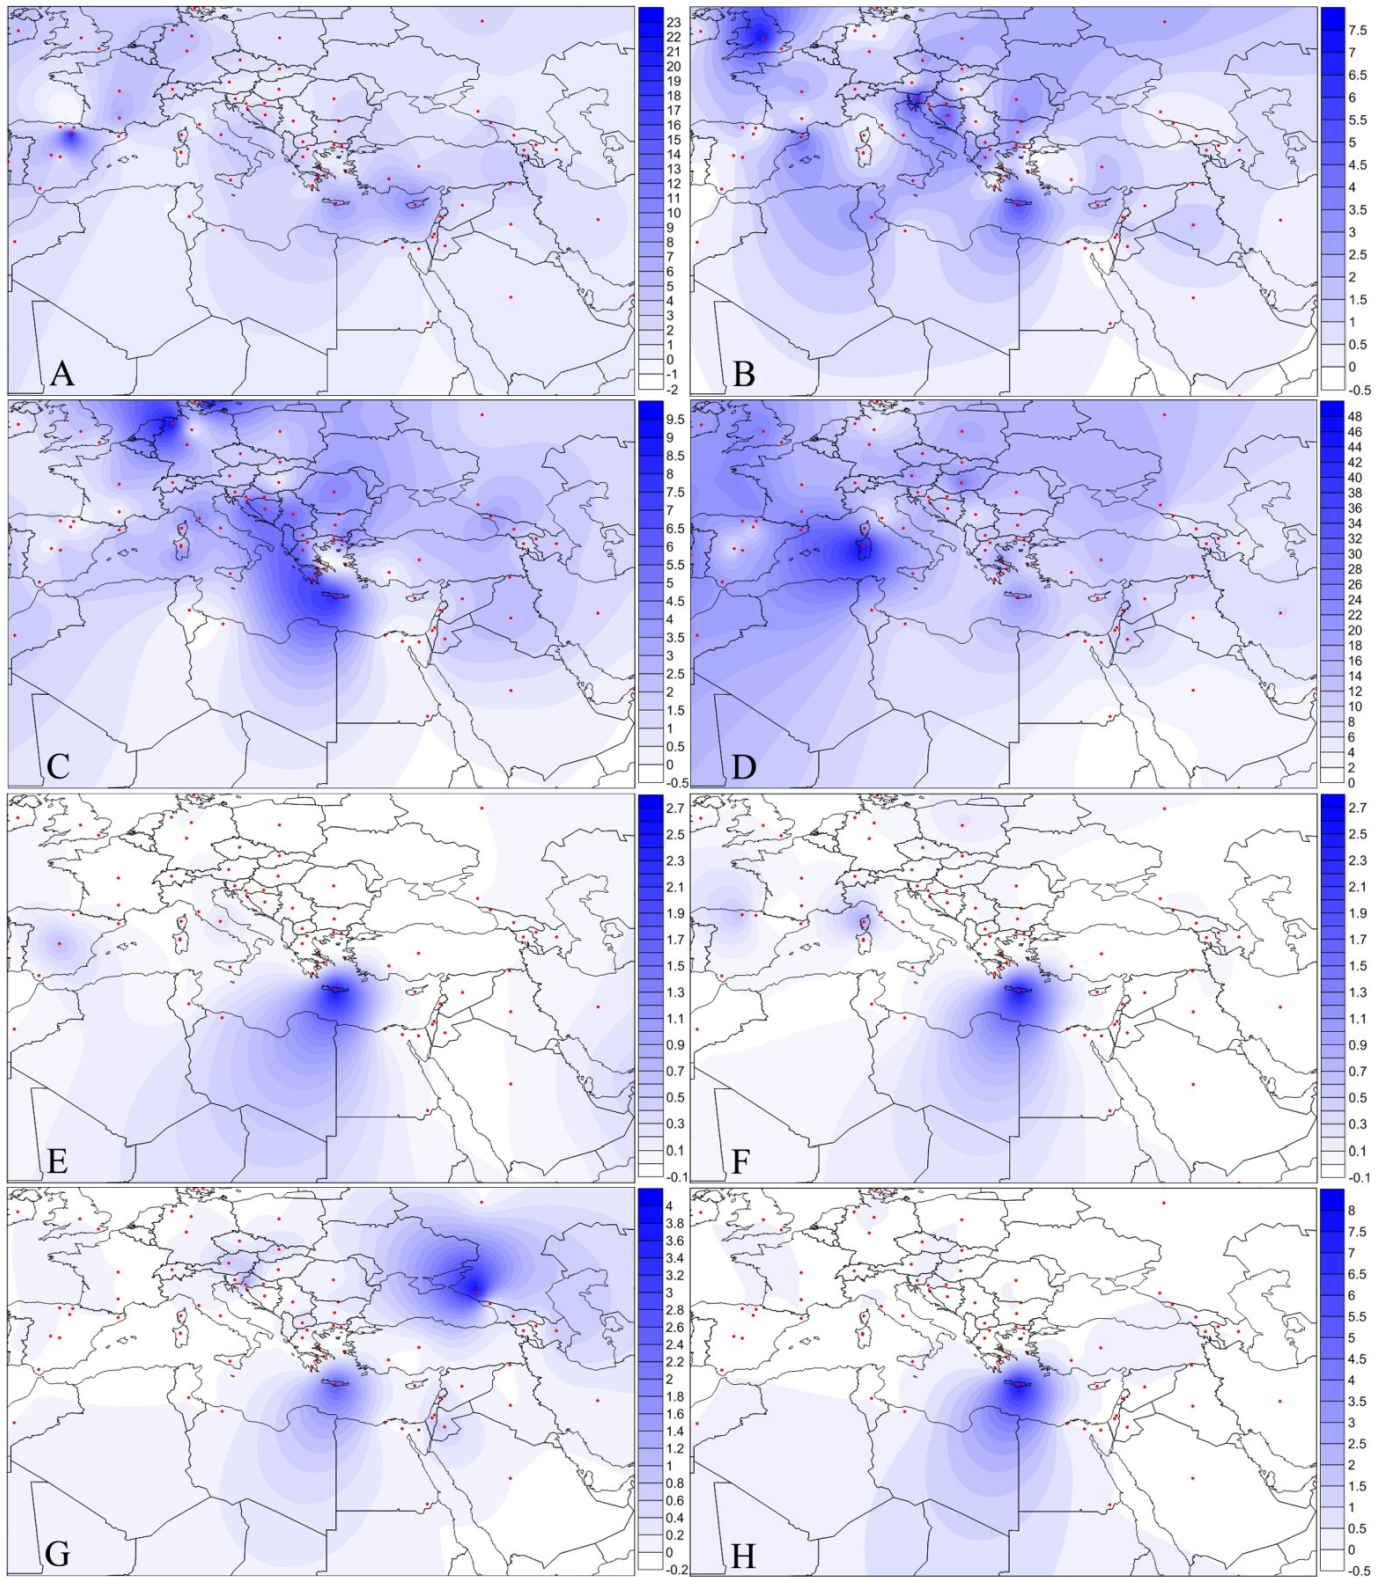

**Supplementary Figure S2.** Geographical interpolation of shared mtDNA HVS-1 lineages. The blue gradient represents the percentage of shared lineages for Minoan haplotypes. The higher percentages are represented in blue and the lower are in white. Crosses denote the location of populations used in this analysis. A, haplotype 1 shared with 63 populations; B, haplotype 12 shared with 50 populations; C, haplotype 13 shared with 61 populations; D, haplotype 14 shared with 82 populations; E, haplotype 16 shared with 6 populations; F, haplotype 17 shared with 4 populations; G, haplotype 18 shared with 13 populations; H, haplotype 20 shared with 1 population.

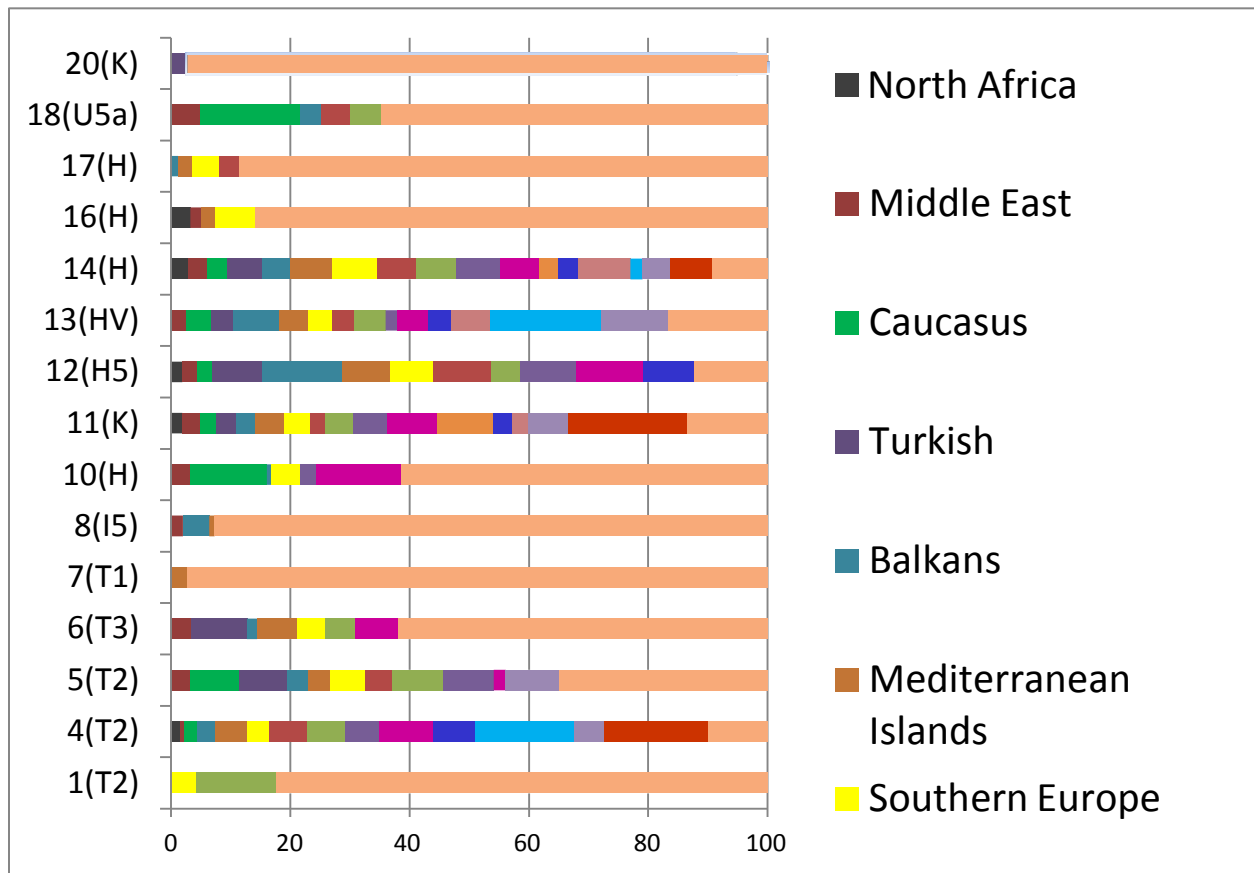

**Supplementary Figure S3. Minoan haplotypes are rarely observed outside Europe.** Distribution of Minoan haplotypes across different geographic regions and eras. Considering the occurrences of each Minoan haplotype across our entire dataset (Minoans, 71 extant populations and 11 additional ancient populations) the percentage of each haplotype per studied geographic region and era is shown. Populations are grouped here in broad geographic regions and eras (Table S4). Six Minoan haplotypes were private to the Minoans and are not shown (Table S2).

### **Supplementary Table S1. Authentication of Results**

---

|                                                                                                                       |    |
|-----------------------------------------------------------------------------------------------------------------------|----|
| Lassithi cave samples compliant with all precautionary ancient DNA criteria                                           | 69 |
| Samples that completely failed to amplify                                                                             | 7  |
| Samples that failed to amplify with all primers                                                                       | 5  |
| Samples with non-reproducible sequencing results                                                                      | 5  |
| Samples with reproducible HVS-1 sequencing results                                                                    | 52 |
| Submitted to DNA extraction and genomic sequencing by a different UW lab and different personnel                      | 52 |
| HVS-1 sequencing not confirmed by genomic sequencing                                                                  | 2  |
| HVS-1 sequences were not present in the DNA submitted to genomic sequencing                                           | 13 |
| Samples in which the results of HVS-1 sequencing were verified by genomic sequencing and used in statistical analysis | 37 |

---

**Confirmation and authentication of sequencing results on DNA extracted from teeth of craniums found in the Lassithi Cave of Ayios Charalambos.**

## Supplementary Table S2. Haplotype Designation for 37 Minoans.

| Individual | HVS-1 SNPs                                        | UW mtDNA Genome Sequencing SNPs          | Haplotype |
|------------|---------------------------------------------------|------------------------------------------|-----------|
| 1AH        | 16311(C)                                          | 14766(C)                                 | HV        |
| 2AH        | -CRS-                                             | 14766(C)                                 | H13a1a    |
| 3AH        | 16126(C), 16294(T), 16296(T),<br>16304(C)         | 16294(T), 4917(G)<br>10463(C) (no 15607) | T2        |
| 6AH        | 16266(T)                                          | None                                     | H         |
| 7AH        | -CRS-                                             | 2706(A), no 16519                        | H         |
| 9AH        | 16304(C)                                          | 2706(A), 16304(C)                        | H5        |
| 10AH       | 16126(C), 16294(T), 16296(T)                      | 14905(A)                                 | T2        |
| 11AH       | 16111(T), <b>16185(T)</b> , 16224(C),<br>16311(C) | 12372(A)                                 | K         |
| 12AH       | -CRS-                                             | 2706(G)                                  | H7        |
| 15AH       | 16111(T), <b>16185(T)</b> , 16224(C),<br>16311(C) | 3480(G), 14167(T),<br>16224(C), 16311(C) | K         |
| 16AH       | -CRS-                                             | 2706(A)                                  | H         |
| 17AH       | -CRS-                                             | 2706(A)                                  | H         |
| 18AH       | 16126(C), 16294(T), 16296(T)                      | 16294 (T), 16296 (T), 1888(A)            | T         |
| 19AH       | -CRS-                                             | 2706(A)                                  | H         |
| 4H         | 16192(T), 16256(T), 16270(T),<br>16311(C)         | 12308(G), 12372(A)                       | U5a       |

|     |                                                                                                              |                                                          |    |
|-----|--------------------------------------------------------------------------------------------------------------|----------------------------------------------------------|----|
| 6H  | 16093(C), 16223(T), 16243(C),<br>16292(T)                                                                    | 204(C), 207(A), 15884(C)<br>16093(C), 16223(T), 16243(C) | W  |
| 7H  | 16290(T)                                                                                                     | 2706(A)                                                  | H  |
| 8H  | 16172(C)                                                                                                     | 2706(A)                                                  | H  |
| 9H  | 16126(C), 16163(G), 16186(T),<br>16189(C), 16263(C), 16294(T)                                                | 10463(C), 15928(A), 16263(C)                             | T1 |
| 16H | 16224(C), 16311(C)                                                                                           | 10550(G), 11299(C),<br>12308(G), 16311(C)                | K  |
| 20H | -CRS-                                                                                                        | 2706(A)                                                  | H  |
| 21H | 16126(C), 16153(A), 16240(A→C),<br>16294(T), 16296(T)                                                        | 10463(C), 13368(A), 15607(G),<br>15298(A), 16153(A)      | T5 |
| 24H | 16311(C)                                                                                                     | 11719(A), 14766(C)                                       | HV |
| 26H | 16069(T), 16126(C), <b>16232(T)</b> ,<br>16291(T), 16293(A→C)                                                | 13708(A)                                                 | J2 |
| #4  | 16182(A→C), 16183(A→C), 16189(C),<br>16234(T), 16290(T), 16324(C)                                            | 16290(T)                                                 | U  |
| #6  | 16311(C)                                                                                                     | 2706(G), 7028(T), 11719(A),<br>14766(C), 16311(C)        | HV |
| #7  | -CRS-                                                                                                        | 73(A), 2706(G), 7028(T)                                  | RO |
| #8  | 16145(A), <b>16179(T)</b> , 16189(C),<br>16223(T), 16278(T), <b>16332(T)</b> ,<br><b>16344(T)</b> , 16362(C) | 153(G), 14470(C), 16278(T)                               | X  |
| #11 | 16290(T), 16304(C)                                                                                           | 16304(C), 16519(T)                                       | H  |
| #12 | 16129(A), 16148(T), <b>16186(T)</b> ,<br>16223(T)                                                            | 16223(T)                                                 | 15 |
| #13 | 16129(A), 16148(T), 16223(T)                                                                                 | 199(T), 250(C), 16129(A)<br>16223(T), 16391(A)           | 15 |

|     |                                                     |                                                     |    |
|-----|-----------------------------------------------------|-----------------------------------------------------|----|
| #14 | 16111(T), 16224(C), 16311(C)                        | 12372(A), 16111(T)                                  | K  |
| #17 | 16129(A), 16148(T), <b>16186(T)</b> ,<br>16223(T)   | 10034(C), 16129(A), 16148(T),<br>16223(T), 16391(A) | I5 |
| #19 | 16089(A), 16126(C), 16294(T),<br>16296(T), 16304(C) | 13368(A)                                            | T2 |
| #21 | 16224(C), 16311(C)                                  | 11467(G), 12308(G)                                  | K  |
| #22 | 16224(C), 16311(C)                                  | 10550(G), 11299(C), 11467(G),<br>12308(G), 16311(C) | K  |
| #23 | 16126(C), 16292(T), 16294(T),<br><b>16339(T)</b>    | 4917(G), 11251(G), 15607 (G),<br>15928(A)           | T3 |

---

**mtDNA Hypervariable Sequence 1 region motifs, mtDNA genome sequencing, and haplotype designations for 37 Minoans. Mutations in bold represent deamination events. In all 37 individuals there was correspondence between HVS 1 sequencing and genome sequencing. Only haplotype defining mutations are noted in the above Table. CRS: Cambridge Reference Sequence; Letters AH, H and the symbol # denote three different groups of Minoans.**



### Supplementary Table S3. Next Generation Genomic Sequencing of 52 Minoans

---

#### Minoan1AH

2852 c→t  
3872 c→t (c)  
3874 c→t (c)  
6029 c→t (c)  
8475 c→t  
10778 c→t  
10967 a→t  
12531 c→t (c)  
12721 c→t (c)  
15583 a→t (a)

#### Minoan2AH

11374 a→c  
11375 a→t

#### Minoan3AH

263 a→g

2706 a→g

4917 a→g

10463 t→c

15166 c→a

15167 t→g

15326 a→g

15599 c→g

16294 c→t

#### Minoan4AH

1254 c→t

5342 c→a

#### Minoan5AH

153 a→g

2772 c→t

2773 a→g

8067 a→c

#### Minoan6AH

204 t→g

262 c→t

263 a→g

3329 t→c

3672 a→c (a)

4933 t→g

5326 c→t

6685 a→g (a)

13852 t→g

14053 a→c

14055 c→t

14727 t→c

14793 a→g

15403 c→t

#### Minoan7AH

263 a→g

309 c→t  
310 t→c  
750 a→g  
2681 g→a (g)  
3374 c→a  
6445 c→a  
9755 g→a  
12372 g→a  
13267 g→a  
14249 g→a  
16519 t→c

#### **Minoan8AH**

**709 g→a**  
**791 g→c**  
**1420 t→c (t)**  
**1438 a→g**  
**1523 a→g**  
**2141 t→c**  
**2617 a→t**  
**2824 c→a**  
**6266 a→g (a)**  
**16001 a→g**

#### **Minoan9AH**

750 a→g  
908 c→g (c)  
1420 t→c (t)  
1438 a→g

2141 t→c (t)  
2617 a→t (a)  
2906 c→a (c)  
2958 a→t  
3011 a→t (a)  
3012 t→g (t)  
3550 g→a  
3702 a→t (a)  
6403 c→g (c)  
6460 g→a (g)  
7125 a→c (a)  
7133 c→g (c)  
9841 c→a  
9931 g→a (g)  
10636 c→t  
11096 a→t  
11098 a→t  
12735 c→t  
13025 a→c  
13264 c→t (c)  
13800 c→t  
13802 c→t (c)  
14020 t→c  
15248 t→a (t)  
15326 a→g  
15401 a→g (a)

#### **Minoan10AH**

750 a→g

1033 t→a (a)  
1438 a→g  
1448 t→g  
11797 a→g (a)  
12509 a→c  
12741 c→t  
14905 g→a  
15452 c→a

#### **Minoan11AH**

497 c→t  
750 a→g  
1419 g→c (g)  
1420 t→c  
1438 a→g  
2617 a→t, a→g (a)  
4917 a→g  
6000 g→a (g)  
7028 c→t  
10776 c→t  
10995 c→a  
12196 c→t  
12372 g→a  
12376 t→g  
12435 c→t (c)  
14167 c→t  
15326 a→g

#### **Minoan12AH**

263 a→g  
712 c→g  
750 a→g  
932 c→g  
934 g→c  
1420 t→c  
1438 a→g  
1465 c→g  
2706 a→g  
3024 t→a  
7914 a→c (a)  
9053 g→t (g)  
9820 g→c  
9829 t→a  
11251 a→g (a)  
11859 t→a  
12717 c→t  
13942 a→c (a)

### **Minoan13AH**

**263 a→g**  
**750 a→g**  
**1420 t→c**  
**1437 t→c**  
**1438 a→g**  
**2535 a→g**  
**13097 t→c**  
**15326 a→g**

### **Minoan14AH**

**5445 c→t**  
**11090 a→c**  
**12215 t→c**  
**12249 a→c**  
**12593 c→t**

### **Minoan15AH**

3480 a→g  
3739 a→c  
7886 g→t  
7888 c→t  
9902 c→t (c)  
9931 g→t  
10398 a→g  
14167 c→t  
14922 c→t (c)  
14932 c→t (c)  
15039 t→c  
15040 c→a  
15326 a→g  
15540 c→t  
15544 c→t  
15607 a→g (a)  
15945 c→t  
16224 t→c  
16311 t→c

### **Minoan16AH**

2709 a→c  
3405 a→g  
4063 g→a  
8685 c→t  
9755 g→a  
12476 g→a (g)  
13351 c→t  
16053 c→t

### **Minoan17AH**

257 a→c  
263 a→g  
2413 c→t (c)  
5307 a→c  
7873 c→t  
16232 c→t  
16243 t→g

### **Minoan18AH**

486 c→t  
1852 c→g  
1888 g→a  
2214 a→c  
2393 c→t  
5303 c→t  
8523 c→t  
9837 g→a  
9939 g→a  
11751 a→g

13272 c→t  
14766 c→t  
15326 a→g  
15452 c→a  
16118 g→a  
16107 c→t  
16292 c→t  
16296 c→t

### **Minoan19AH**

263 a→g  
750 a→g  
874 g→a  
1438 a→g  
1720 c→t  
2419 c→t  
2755 a→g  
3433 t→a  
3434 a→g  
3468 a→c (a)  
8147 c→t (c)  
8622 c→t  
9778 g→a (g)  
9785 c→t  
10244 c→a  
10877 c→a  
10894 c→t  
11588 c→t (c)  
11645 c→t

11639 a→c  
11870 c→g (c)  
12374 c→t  
12446 a→t  
12561 g→c  
13180 g→t  
13335 c→t  
14413 c→a (c)  
15386 c→t (c)  
15740 c→t  
15782 c→a (c)  
15911 a→g  
16302 a→g

### **Minoan20AH**

**263 a→g**  
**2683 c→a (c)**  
**2706 a→g**  
**10641 a→c**  
**10676 c→a (a)**  
**12990 a→t**  
**14472 c→a**  
**15341 t→g**

### **Minoan3H**

**348 c→t**  
**6684 t→g**  
**9755 g→a**  
**9779 c→g**

**12346 c→t**  
**16422 t→c**

### **Minoan4H**

495 c→t (c)  
1511 c→t  
2706 a→g  
7028 c→t  
7641 a→t  
9888 a→c (a)  
9889 c→a (c)  
11719 g→a  
12308 a→g  
12372 g→a  
16399 a→g  
16519 t→c

### **Minoan6H**

73 a→g  
204 t→c  
207 g→a  
263 a→g  
310 t→c  
332 c→t  
834 g→c  
1019 a→g  
1438 a→g  
2706 a→g  
3006 t→c (t)

3012 t→g (t)  
3146 g→a  
4837 c→t  
5046 g→a  
11277 c→a (c)  
11674 c→t  
11679 deletion  
11719 g→a  
11947 a→g  
13228 a→t  
13570 a→t  
14031 a→t  
14407 c→t  
15326 a→g  
15884 g→c  
15950 g→a  
16093 t→c  
16223 c→t  
16243 t→c  
16519 t→c

#### **Minoan7H**

750 a-g  
753 a-c  
1438 a-g  
2782 a-t  
2785 c-t  
3804 c-a  
7708 c-t

9784 a-c  
9793 c-a  
9884 c-t (c)  
10089 a-c  
11090 a-c (a)  
11945 a-t  
12928 c-t  
12930 a-t  
13513 g-a (g)  
13742 c-t

#### **Minoan8H**

1418 g→a (g)  
1419 g→a (g)  
1903 c→t  
1907 a→c  
4029 c→a  
8189 g→a  
9319 a→c  
9755 g→a  
10921 a→g  
12531 c→t  
12535 c→t  
13043 c→t (c)  
13044 c→t (c)  
13673 a→c  
13679 c→t (c)  
13957 g→a (g)  
14873 c→a

15326 a→g  
15612 g→t (g)  
16267 c→t

#### **Minoan9H**

3127 g→a  
3442 c→t (c)  
3717 c→t (c)  
9257 c→a (c)  
9266 g→a  
10093 t→c  
10463 t→c  
11927 a→g  
12633 c→a  
13063 g→a  
14766 c→t  
15654 t→a  
15674 t→a (t)  
15928 g→a  
16263 t→c

#### **Minoan10H**

**3320 a→c**  
**12210 a→g**  
**13119 c→t**  
**15217 g→a**

#### **Minoan12H**

**710 t→c (t)**

2366 g→a  
9770 t→c  
9772 c→a  
7906 c→t  
11853 c→a  
11855 a→c  
11856 a→t  
13055 c→t  
13056 c→t  
16504 g→a

#### Minoan15H

263 a→g  
750 a→g  
5360 c→g  
7245 a→g  
9031 c→t  
9034 c→t  
13790 a→t (a)  
13959 c→a (c)  
15246 g→a (g)  
14916 c→a

#### Minoan16H

16 a→t  
41 c→t (c)  
150 c→t  
185 g→a  
497 c→t

750 a→g  
2227 a→t (a)  
2706 a→g  
2834 c→t (c)  
3492 a→c  
3661 t→g  
3739 a→c  
3913 g→a  
3916 g→a  
4769 a→g  
6400 c→t  
6446 g→t  
7028 c→t  
7707 c→t (c)  
8414 c→a (c)  
8415 t→g (t)  
8416 c→a (c)  
8417 c→t  
9055 g→a  
9061 c→a (c)  
9852 a→c (a)  
10398 a→g  
10448 t→a  
10452 g→a  
10550 a→g  
10630 t→c (t)  
11169 g→c (g)  
11299 t→c  
11397 a→c (a)

11687 a→c (a)  
11786 a→g (a)  
12267 c→g (c)  
12286 a→c  
12308 a→g  
12591 c→g  
13806 c→t (c)  
13807 c→t (c)  
13953 t→c (t)  
14167 c→t  
14991 t→c  
14989 c→t  
15026 c→t  
15121 a→t (a)  
15280 c→t  
15326 a→g  
16311 t→c  
16467 c→a  
16475 t→a

#### Minoan20H

394 c→t (c)  
426 a→t (a)  
800 c→t (c)  
1890 c→t (c)  
2393 c→a (c)  
2526 c→t (c)  
2851 a→g (a)  
3448 c→a (c)

3539 c→t (c)  
5042 a→t (a)  
6021 g→a  
6915 g→a (g)  
6917 g→a (g)  
7491 c→t  
8208 c→t (c)  
9078 t→c  
9755 g→a  
9764 c→t (c)  
9815 c→t (c)  
10404 t→a (t)  
10607 c→t (c)  
10954 c→a (c)  
11090 a→c (a)  
12591 c→t (c)  
12593 c→t (c)  
13151 t→c (t)  
13683 c→t (c)  
13759 g→a (g)  
13986 a→g  
14029 deletion  
15326 a→g  
15418 c→t (c)

#### **Minoan21H**

73 a→g  
220 t→g  
413 g→a (g)

415 a→c (a)  
433 c→a (c)  
1438 a→g  
2840 c→a  
3172 c→t (c)  
9869 c→a (c)  
10463 t→c  
11251 a→g  
11812 a→g  
13368 g→a  
14563 c→t  
14850 c→t  
15326 a→g  
15343 c→t (c)  
15347 c→t (c)  
15607 a→g  
15928 g→a  
16153 g→a  
16519 t→c  
16522 t→g (t)

#### **Minoan24H**

933 g→a  
934 g→a  
3638 t→c  
3639 a→t  
14840 a→c  
14839 a→g

#### **Minoan26H**

936 g→a  
937 t→g  
938 a→t  
6243 g→a  
11426 g→c  
11427 c→t  
11768 a→t  
11772 a→g  
11909 a→c  
13708 g→a  
13984 c→t

#### **Minoan#1**

**166 c→t**  
**246 t→g**  
**263 a→g**  
**276 a→g**  
**278 a→t**  
**279 t→c**  
**750 a→g**  
**3884 c→t**  
**7218 c→t**  
**7706 g→t**  
**9201 c→g**  
**9798 t→a**  
**10698 c→t**  
**11187 t→a**  
**11190 a→t**

**Minoan#2**

263 a→g  
 724 c→t  
 725 c→t  
 1749 c→t  
 1861 t→g  
 2150 t→g (t)  
 2706 a→g  
 3858 a→t (a)  
 3859 t→c (t)  
 6028 g→c  
 6663 a→t  
 6664 t→a  
 6958 g→c  
 7028 c→t  
 8709 c→t  
 9901 a→c  
 10700 a→g  
 12053 c→t  
 12488 c→t  
 15326 a→g  
 15603 a→t (a)  
 15637 c→a (c)  
 15999 a→c  
 16299 a→g

**Minoan#4**

2270 a→t  
 5066 c→t

7850 g→t  
 9055 g→a  
 9262 c→a  
 10722 t→a  
 11518 g→c  
 11519 a→t  
 15770 c→t  
 16290 c→t

**Minoan#5**

551 a→t  
 2571 g→a  
 4099 c→t  
 4886 c→t  
 9889 t→a  
 9890 t→a  
 11194 a→g  
 11959 a→g  
 14149 c→t  
 14167 c→t  
 15326 a→g

**Minoan#6**

100 g→c  
 227 a→t  
 228 g→a  
 362 c→t (c)  
 512 a→c (a)  
 750 a→g

983 c→t  
 1529 a→g  
 1563 t→a  
 1564 a→g  
 1910 c→a  
 2214 a→c  
 2451 t→a (t)  
 2706 a→g  
 2788 c→t  
 2790 a→c  
 3061 g→c (g)  
 3314 t→c (t)  
 3315 g→t (g)  
 3477 c→a (c)  
 3488 t→a (t)  
 3589 c→g (c)  
 3590 t→c (t)  
 3602 a→c (a)  
 3606 g→t (g)  
 3608 g→t (g)  
 3609 c→t (c)  
 3610 c→a (c)  
 3612 c→t (c)  
 3628 a→c (a)  
 3654 c→g (c)  
 3709 g→t (g)  
 4089 c→t  
 5309 c→a (c)  
 6006 c→t (c)



6264 g→a (g)  
6419 a→c (a)  
6600 c→a  
6663 a→t (a)  
6909 g→t (g)  
7028 c→t  
7649 a→c (a)  
7735 a→g  
8015 c→t (t)  
8078 g→a (g)  
8079 t→a (t)  
8157 t→c (t)  
8160 a→t (a)  
9514 a→c (a)  
9848 c→a (c)  
9864 a→c  
10132 c→g (c)  
10161 a→c (a)  
10163 c→a (c)  
10164 c→g (c)  
10165 c→a (c)  
10401 g→a (g)  
10660 t→c (t)  
10685 g→t (g)  
11090 a→c (a)  
11151 c→t (c)  
11156 a→g  
11267 a→t (a)  
11302 t→a (t)

11398 c→a  
11780 a→c (a)  
11791 c→t (c)  
11793 c→t (c)  
11809 t→g (t)  
12576 c→a (c)  
12624 t→c (t)  
12625 a→t (a)  
12759 c→a (c)  
12872 a→g (a)  
12897 a→c (a)  
13024 c→a  
13052 g→t (g)  
13077 c→t (c)  
13078 c→t (c)  
13243 g→t (g)  
13347 c→t (c)  
13509 c→a (c)  
13567 a→c (a)  
13718 g→a (g)  
13731 a→c (a)  
13807 c→a (c)  
13840 c→a (c)  
13908 c→g (c)  
14175 c→t (c)  
14403 t→a (t)  
14550 t→g (t)  
14770 c→t  
14854 c→t (c)

15033 t→c (t)  
15154 c→t (c)  
15155 c→t (c)  
15237 t→a (t)  
15326 a→g  
15364 c→t (c)  
15411 c→t (c)  
15415 c→t (c)  
15430 c→t (c)  
15563 t→a (t)  
15756 g→a (g)  
15757 a→g (a)  
15783 c→t (c)  
15897 g→t  
16086 t→g (t)  
16089 g→t (g)  
16119 a→c (a)  
16148 c→a (c)  
16311 t→c  
16490 g→t (g)

### **Minoan#7**

85 g→a (g)  
310 t→c  
750 a→g  
827 a→g (a)  
951 g→t  
1438 a→g  
1690 c→t

1691 c→t  
1723 a→c (a)  
2434 a→g (a)  
2706 a→g  
3475 a→t (a)  
3712 g→a  
5450 c→g  
6459 t→a  
7028 c→t  
7661 c→a  
9639 a→g  
10056 g→t  
10688 g→t (g)  
10920 c→t  
10923 c→t  
10947 c→t (c)  
10950 c→t (c)  
11338 c→a  
11598 c→a  
12348 c→t (c)  
12350 c→t (c)  
11485 t→g  
12817 c→t  
12928 c→t (c)  
13019 g→c (g)  
13499 g→a (g)  
13895 t→c  
13991 t→c  
14109 c→a

14383 c→g (c)  
14642 c→t  
14643 c→t  
14817 c→a  
15133 a→g  
15474 c→g  
15598 c→t  
15699 g→t (g)  
15738 a→t  
15771 c→g  
16232 c→t (c)  
16234 c→t (c)  
16311 t→c  
16566 g→a

### **Minoan#8**

73 a→g (a)  
153 a→g  
263 a→g  
750 a→g  
892 a→c  
1438 a→g  
2683 c→g (c)  
2706 a→g  
2822 c→t (c)  
2824 c→t (c)  
3469 c→a  
5304 c→t (c)  
5306 c→t (c)

7028 c→t  
7132 c→g (c)  
7164 g→a  
7909 c→t (c)  
8393 c→t  
8518 a→c (a)  
8934 c→t  
10954 c→t  
10955 c→t  
11433 t→g (t)  
11434 c→a (c)  
11435 g→t (g)  
11462 c→t  
12174 c→t  
12206 c→t (c)  
12207 g→a (g)  
12564 c→t (c)  
13248 c→t (c)  
13250 c→t (c)  
13708 g→a  
13924 c→t  
13958 g→a (g)  
14367 c→t  
14373 c→t  
14470 t→c  
15380 a→c (a)  
15651 c→t (c)  
15927 g→a  
16278 c→t

**Minoan#9**

688 a→t  
 692 c→t  
 3625 g→c (c)  
 3321 c→a  
 3628 a→c  
 6445 c→t  
 7492 c→t  
 8375 c→t  
 9862 t→g  
 10652 t→c  
 10653 g→t  
 12191 c→a  
 14020 t→c  
 14145 a→g (a)  
 14150 c→t  
 14818 a→t  
 15091 c→t  
 15089 a→c  
 15326 a→g  
 15649 a→g (a)

**Minoan#11**

152 t→c  
 263 a→g  
 395 a→t  
 518 c→t (c)  
 1438 a→g  
 1887 a→t (a)

2047 t→g (t)  
 2081 t→a  
 2146 a→c (a)  
 2571 g→a  
 3144 a→c (a)  
 3145 a→t (a)  
 3173 g→t (g)  
 3317 c→t  
 3318 c→t  
 3322 c→t  
 3334 a→t (a)  
 3335 t→c (t)  
 3488 t→a (t)  
 3607 g→a  
 5453 a→t  
 6315 c→a (c)  
 6716 a→c  
 6962 g→a  
 7500 c→t  
 7903 a→g  
 7905 c→t  
 9308 a→g  
 9886 t→c (t)  
 9991 a→g (a)  
 10400 c→a  
 10788 t→a (t)  
 11643 c→t  
 11645 c→t  
 12461 c→t (c)

12462 c→t (c)  
 12703 a→t  
 12704 t→c  
 12705 c→t  
 13560 c→t (c)  
 13746 c→t (c)  
 15148 g→a  
 15326 a→g  
 16304 t→c

**Minoan#12**

5826 t→g (t)  
 12485 c→t  
 12961 a→g  
 13791 c→t  
 14145 a→g  
 14150 c→t  
 14152 a→g  
 14179 a→g  
 15892 t→g (t)  
 15927 g→c (g)  
 16223 c→t  
 16225 c→t  
 16234 c→t

**Minoan#13**

198 c→a (c)  
 199 c→t  
 250 t→c

263 a→g  
750 a→g  
1719 g→a  
2766 c→t (c)  
3172 c→a (c)  
3201 a→t  
3330 c→t  
3399 a→t (a)  
3401 a→t (a)  
3460 g→a (g)  
3492 a→c (a)  
3608 g→c (g)  
5304 c→t  
5305 c→t  
6553 c→t  
7028 c→t  
7699 c→t (c)  
8018 c→t  
8030 c→t (c)  
10034 t→c  
10398 a→g  
10541 a→t  
10545 c→t  
11141 c→t  
11144 a→c  
11717 g→a (g)  
11719 g→a  
12501 g→a  
12705 c→t

12773 g→a (g)  
12788 c→t (c)  
12795 g→t (g)  
12961 a→g  
13370 c→t (c)  
13371 c→t (c)  
13780 a→g  
13811 c→a (c)  
13837 g→a (g)  
14054 c→a  
15043 g→a  
15326 a→g  
15924 a→g  
15980 c→t  
16129 g→a  
16223 c→t  
16391 g→a  
16519 t→c

#### **Minoan#14**

956 c→a  
983 c→g  
2347 c→t (c)  
3739 a→g  
4928 t→a  
5488 c→g  
12372 g→a  
14766 c→t  
15612 g→t

16073 c→a  
16111 c→t  
16519 t→c

#### **Minoan#17**

73 a→g  
143 g→a  
263 a→g  
473 c→t  
750 a→g  
801 a→t  
1421 g→a (g)  
1438 a→g  
1511 c→t  
1719 g→a  
2525 c→t (c)  
2706 a→g  
3155 c→t  
3711 a→c (a)  
3715 g→a (g)  
5054 g→c  
6480 g→t  
7028 c→t  
8481 c→a  
9062 t→c (t)  
9063 a→t (a)  
9514 a→c  
9865 t→a (t)  
9866 c→g (c)

9953 a→t (a)  
10034 t→c  
10238 t→c  
10398 a→g  
10485 a→g (a)  
11306 g→t  
11312 g→t  
11518 g→t (g)  
11868 c→g (c)  
12705 c→t  
13024 c→a  
13485 a→g (a)  
13487 c→t (c)  
13681 a→t (a)  
13780 a→g  
13943 c→a  
13944 a→g  
15043 g→a  
15298 c→t  
15326 a→g  
15551 a→c (a)  
16129 g→a  
16148 c→t  
16223 c→t  
16265 a→c  
16391 g→a  
16519 t→c

#### **Minoan#19**

750 a→g  
7028 c→t  
13368 g→a  
14338 c→a  
14986 c→t (c)  
16206 a→g

#### **Minoan#20**

**320 c→a (c)**  
**321 t→g (t)**  
**322 g→a (g)**  
**750 a→g**  
**1438 a→g**  
**2706 a→g**  
**2833 c→t (c)**  
**2835 c→t (c)**  
**4944 a→g**  
**7012 c→a**  
**7028 c→t**  
**7864 c→a**  
**7880 t→g**  
**9055 g→a**  
**9801 g→t**  
**10398 a→g**  
**12495 a→c**  
**13806 c→a**  
**13807 c→g**  
**14066 c→a**  
**14167 c→t**

14392 c→a  
14854 c→t  
14855 c→t

#### **Minoan#21**

263 a→g  
497 c→t  
508 a→g  
509 c→a  
635 c→a  
750 g→a  
1818 a→t  
1852 c→a  
2648 t→g  
3431 c→a  
3432 c→g  
3433 t→a  
4089 c→t  
9055 g→a  
9732 c→t  
9901 a→c  
9970 c→a  
9971 c→g  
11188 g→a  
11467 a→g  
12062 a→c  
12089 a→t  
12308 a→g  
13393 g→a

13854 c→a

**Minoan#22**

16 a→t  
73 a→g  
148 a→t (a)  
150 c→t  
302 a→c (a)  
308 t→c  
385 a→g  
386 c→t  
530 c→t  
750 a→g  
1374 a→t  
2405 c→a (c)  
3073 c→t  
3288 a→g (a)  
3310 c→g (c)  
5452 c→a  
5477 c→a (c)  
7839 a→g  
7871 a→t (a)  
8165 g→a  
9652 a→t  
10161 a→t (a)  
10188 a→g  
10398 a→g  
10530 g→t  
10550 a→g

10618 a→t  
10620 a→g  
11243 a→c (a)  
11299 t→c  
11324 t→c  
11382 c→g  
11383 t→g (t)  
11467 a→g  
11467 a→g  
11467 g→a  
12308 a→g  
12561 g→a  
12561 g→a  
13384 c→t (c)  
13385 t→a (t)  
13962 t→c  
13965 t→a  
14416 a→c  
14416 a→c  
14651 a→t  
14979 t→g  
15063 c→t (c)  
15064 a→t (a)  
15497 g→a (g)  
15498 g→a (g)  
16224 t→c  
  
**Minoan#23**  
73 a→g

105 c→g  
146 t→c  
750 a→g  
1438 a→g  
1505 a→g  
2333 g→a (g)  
2706 a→g  
3062 t→a  
3161 g→a  
3407 g→c (g)  
4475 t→c  
4739 c→a (c)  
4917 a→g  
4995 c→a (c)  
4974 g→c (g)  
4978 t→c (t)  
4979 a→t (a)  
5438 c→t (c)  
7028 c→t  
7173 a→c (a)  
7260 c→t (c)  
7665 c→g  
7782 c→t  
7913 t→a (t)  
7914 a→t (a)  
8525 a→c (a)  
9258 c→t (c)  
9928 a→c (a)  
10117 t→g (t)

|               |               |               |
|---------------|---------------|---------------|
| 10137 c→a     | 11450 c→t (c) | 13628 t→a     |
| 10277 a→c (a) | 11571 t→c (t) | 15039 t→c (t) |
| 10314 c→a (c) | 11600 g→a (g) | 15326 a→g     |
| 10361 t→g (t) | 11812 a→g     | 15452 c→a     |
| 10754 a→t     | 11975 t→c (t) | 15588 t→a (t) |
| 10836 a→c (a) | 12129 t→a (t) | 15607 a→g     |
| 10837 c→t (c) | 12130 t→g (t) | 15928 g→a     |
| 10840 a→g (a) | 12302 c→a     | 16066 a→t (a) |
| 10841 a→c (a) | 12906 c→a (c) | 16369 g→a (g) |
| 11251 a→g     | 12907 c→t (c) | 16524 a→g     |
| 11300 c→g (c) | 13250 c→a     | 16539 a→g (a) |

---

**mtDNA SNPs based on a comparison to the CRS as determined from the genome sequencing analysis of 52 Minoans performed at the University of Washington, Seattle. "()" indicates another nucleotide present in 1 or more 36 mer. In black are the 37 cases in which the HVS-1 sequencing was confirmed by the next generation genomic sequencing. In red color are 13 cases in which HVS-1 sequencing was not confirmed by genomic sequencing because of absence of HVS1 fragments in the sequenced DNA. In blue are two cases in which the genomic sequencing did not confirm the HVS1 sequencing.**

**Supplementary Table S4: Populations compared with the 37 Minoan samples.**

---

| <b>Population Name</b>     | <b>Consolidated Population Labels</b> | <b>Samples</b> | <b>Reference</b>                                            |
|----------------------------|---------------------------------------|----------------|-------------------------------------------------------------|
| <b><u>Balkans</u></b>      |                                       |                |                                                             |
| Albanian                   | Albanian                              | 42             | Belledi, Eur. J. Hum. Genet. 8, 480-6, 2000.                |
| Albanian                   | "                                     | 42             | Bosch, Annals Hum. Genet. 70, 459-487, 2006.                |
| Aromuns-Dukasi, Albania    | Aromuns                               | 33             | Bosch, Annals Hum. Genet.70, 459-487, 2006.                 |
| Aromuns-Krusevo, Macedonia | "                                     | 33             | Bosch, Annals Hum. Genet.70, 459-487, 2006.                 |
| Aromuns-Poci, Albania      | "                                     | 29             | Bosch, Annals Hum. Genet.70, 459-487, 2006.                 |
| Aromuns-Romania            | "                                     | 42             | Bosch, Annals Hum. Genet.70, 459-487, 2006.                 |
| Aromuns-Stip, Macedonia    | "                                     | 38             | Bosch, Annals Hum. Genet.70, 459-487, 2006.                 |
| Bosnian                    | Bosnian                               | 150            | Harvey, direct deposit, accession numbers AY005485-AY005644 |
| Bosnian                    | "                                     | 144            | Malyarchuk, Ann. Hum. Genet. 67, 412-425, 2003.             |
| Bulgarian                  |                                       | 855            | Karachanak, Int. J. Legal Med. 126, 497-503, 2012           |
| Croatian                   |                                       | 58             | Harvey, direct deposit, accession numbers AY005666-AY005724 |
| Romanian and Bulgarian     |                                       | 233            | Richards, Am. J. Hum. Genet. 67, 1251-1276, 2000.           |
| Romanian-Constantia        | Romanian                              | 59             | Bosch, Annals Hum. Genet.70, 459-487, 2006.                 |
| Romanian-Ploiesti          | "                                     | 46             | Bosch, Annals Hum. Genet.70, 459-487, 2006.                 |
| Serbian                    |                                       | 54             | Harvey, direct deposit, accession numbers AY005728-AY005784 |
| Slavic Macedonians         | Slavic Macedonian                     | 37             | Bosch, Annals Hum. Genet.70, 459-487, 2006.                 |
| Slavic Macedonians         | "                                     | 200            | Zimmermann, Forensic Sci Int Genet 1, e4-e9, 2007.          |
| Slovenian                  |                                       | 104            | Malyarchuk, Ann. Hum. Genet. 67, 412-425, 2003.             |
| <b><u>Caucasus</u></b>     |                                       |                |                                                             |
| Abkazian                   |                                       | 27             | Nasidze, Ann. Hum. Genet. 68, 205-21, 2004.                 |
| Adegei                     |                                       | 50             | Macaulay, Am J. Hum. Genet. 64:232-249, 1999.               |
| Armenian                   |                                       | 191            | Richards, Am. J. Hum. Genet. 67, 1251-1276, 2000.           |
| Azeri                      | Azeri                                 | 39             | Nasidze, Ann. Hum. Genet. 68, 205-21, 2004.                 |



|          |          |     |                                                       |
|----------|----------|-----|-------------------------------------------------------|
| Azeri    | “        | 30  | Schonberg, Eur. J. Genet. 19, 988-994, 2011.          |
| Azeri    | “        | 51  | Richards, Am. J. Hum. Genet. 67, 1251-1276, 2000.     |
| Caucasus |          | 57  | Quintana-Murci, Am. J. Hum. Genet. 74, 827-245, 2004. |
| Georgian | Georgian | 57  | Nasidze, Proc. R. Soc., 268, 1197-1206, 2001.         |
| Georgian | “        | 179 | Reidla, Genbank Accession numbers AJ389197-AJ389375.  |
| Georgian | “        | 28  | Schonberg, Eur. J. Hum. Genet. 19, 988-994, 2011.     |

### **Central Europe**

|          |        |     |                                                     |
|----------|--------|-----|-----------------------------------------------------|
| Austrian |        | 117 | Parson, Int. J. Legal Med., 111, 124-132, 1998.     |
| German   | German | 140 | Richards, Am. J. Hum. Genet. 59, 185-203, 1996.     |
| Bavarian | “      | 49  | Richards, Am. J. Hum. Genet. 59, 185-203, 1996.     |
| Swiss    |        | 153 | Dimo-Simonin, Int. J. Legal Med., 113, 89-97, 2000. |

### **North Eastern Europe**

|            |  |     |                                                      |
|------------|--|-----|------------------------------------------------------|
| Slovakians |  | 374 | Lehocky, Forensic Sci. Int. Genet. 2, e53-e59, 2008. |
| Czech      |  | 178 | Malyarchuk, Hum Biol, 78, 681,196. 2008              |
| Polish     |  | 436 | Malyarchu, Ann Hum Genet 66, 261-283, 2002           |
| Russian    |  | 201 | Malyarchuk, Ann Hum Genet 66, 261-283, 2002          |

### **Western Mediterranean Islands**

|                            |           |     |                                                |
|----------------------------|-----------|-----|------------------------------------------------|
| Balearic Islands           |           | 67  | Falchi, J. Hum. Genet. 51, 9-14, 2006.         |
| Corsican                   | Corsican  | 46  | Varesi, Am. J. Hum. Biol. 12, 339-351, 2000.   |
| South Corsican             | “         | 53  | Falchi, J. Hum. Genet. 51, 9-14, 2006.         |
| Central Sardinia           | Sardinian | 51  | Falchi, J. Hum. Genet. 51, 9-14, 2006.         |
| North Sardinia             | “         | 50  | Falchi, J. Hum. Genet. 51, 9-14, 2006.         |
| San Pietro South Sardinia  | “         | 44  | Falchi, J. Hum. Genet. 51, 9-14, 2006.         |
| San Antioco South Sardinia | “         | 42  | Falchi, J. Hum. Genet. 51, 9-14, 2006.         |
| Sardinian-Trexenta         | “         | 69  | Richards, Am. J. Hum. Genet. 59:185-203, 1996. |
| Sardinian-Trexenta         | “         | 47  | Falchi, J. Hum. Genet. 51, 9-14, 2006.         |
| Sciaccia-West Sicilian     | Sicilian  | 80  | Forster, Int. J. Legal Med. 116, 99-108, 2002. |
| Sicilian                   | “         | 154 | Ottoni, Annals Hum. Biol., 36, 785-811, 2010.  |

|                           |           |     |                                                       |
|---------------------------|-----------|-----|-------------------------------------------------------|
| Sicilian                  | “         | 49  | Vona, Am. J. Hum. Biol., 13, 576-589 2001.            |
| <b><u>Middle East</u></b> |           |     |                                                       |
| Druze Israel              | Druze     | 45  | Macaulay, Am. J. Hum. Genet. 64, 232-449, 1999.       |
| Druze North Israel        | “         | 311 | Shlush, PloS ONE, 3, e2105, 2008.                     |
| Dubai                     |           | 248 | Alshamali, For. Sci. Inter.: Gen2. e9-e10, 2008.      |
| Iranian                   | Iranian   | 436 | Metspalu, BMC Genetics, 5:26, 2004.                   |
| Iranian-Arabs             | “         | 46  | Nasidze, Ann. Hum. Genet. 72, 241-253, 2008.          |
| Iranian-Bakhtiari         | “         | 53  | Nasidze, Ann. Hum. Genet. 72, 241-253, 2008.          |
| Iranian-Isfahan           | “         | 46  | Nasidze, Ann. Hum. Genet. 68, 205-221, 2004.          |
| Iranian-North             | “         | 31  | Terreros, J. Hum. Genet. 56, 235-246, 2011.           |
| Iranian-South             | “         | 116 | Terreros, J. Hum. Genet. 56, 235-246, 2011.           |
| Iranian-Tehran            | “         | 80  | Nasidze, Ann. Hum. Genet. 68, 205-221, 2004.          |
| Iranian-Tehran            | “         | 30  | Schonberg, Eur. J. Hum. Genet. 19,988-994, 2011.      |
| Iraqi                     | Iraqi     | 115 | Richards, Am. J. Hum. Genet. 67, 1251, 2000.          |
| Iraqi                     | “         | 174 | Al-Zahery, BMC Evolutionary Biol.11, 288, 2011.       |
| Iraq-Marsh Arabs          | “         | 144 | Al-Zahery, BMC Evolutionary Biol.11, 288, 2011.       |
| Jordanian-Amman           | Jordanian | 101 | Gonzalez, Ann. Hum. Biol., 35, 212-231, 2008.         |
| Jordanian-Dead Sea        | “         | 44  | Gonzalez, Ann. Hum. Biol., 35, 212-231, 2008.         |
| Kurds- Kurmanji           | Kurdish   | 51  | Nasidze, Annals of Human Genetics. 69: 401-412, 2005  |
| Kurds-E.Turkey            | “         | 54  | Richards, Am. J. Hum. Genet. 67, 1251-1276, 2000.     |
| Kurds-Georgia             | “         | 29  | Comas, Am J. Phys. Anth. 112, 5-16, 2000.             |
| Kurds-Turkmen             | “         | 32  | Quintana-Murci, Am J. Hum. Genet. 74, 827-284,2004.   |
| Kurds-W.Iran              | “         | 20  | Quintana-Murci, Am J. Hum. Genet. 74, 827-284,2004.   |
| Kurds-Zazaki              | “         | 27  | Nasidze, Annals of Human Genetics. 69: 401-412, 2005. |
| Lebanese                  |           | 363 | Haberl, Ann Hum. Genet. 76, 1-8, 2012.                |
| Palestinian               |           | 117 | Richards, Am. J. Hum. Genet. 67, 1251, 2000.          |
| Saudi                     |           | 553 | Abu-Amero, BMC Evolu. Biol. 8, Spec. Sec. 1-15, 2008. |
| Syrian                    | Syrian    | 49  | Venesi, PNAS, 98, 13460, 2001.                        |
| Syrian Damascus           | Syrian    | 69  | Richards, Am. J. Hum. Genet. 67, 1251, 2000.          |
| Yemenite                  |           | 115 | Kivisild. Am. J. Hum. Genet. 75, 752-770, 2004.       |

### **North Africa**

|                  |          |     |                                                        |
|------------------|----------|-----|--------------------------------------------------------|
| Egypt            | Egyptian | 94  | Krings, Am J. Hum. Genet. 64, 1166-1176, 1999.         |
| Upper Egypt      | "        | 57  | Stevanovitch Ann. Hum. Genet. 68, 23-39, 2003          |
| Egypt-Alexandria | "        | 277 | Saunier, Forensic Sci. Int. Genet. 3,397-103, 2009.    |
| Libyan           |          | 269 | Fadhlaoui-Zid, Am. J. Phys. Anthrop. 145,107-117, 2011 |
| Morocco Central  |          | 55  | Turchi, Forensic Sci. Int. Genet. 3, 166-172, 2009.    |
| Nubian           |          | 83  | Krings, Am J. Hum. Genet. 64, 1166-1176, 1999.         |
| South Sudanese   |          | 76  | Krings, Am J. Hum. Genet. 64, 1166-1176, 1999.         |
| Tunisia Coast    |          | 64  | Turchi, Forensic Sci. Int. Genet. 3, 166-172, 2009.    |

### **Northern Europe**

|         |         |     |                                                 |
|---------|---------|-----|-------------------------------------------------|
| English | English | 100 | Piercy, Int. J. Med. 106, 85-90, 1993.          |
| English | "       | 142 | Helgason, Am. J. Hum. Genet. 68, 723-737, 2001. |
| Irish   |         | 299 | McEvoy, Am. J. Hum. Genet. 75, 693-702, 2004.   |
| Wales   |         | 92  | Richards, Am. J. Hum. Genet. 59, 185-203, 1996. |

### **Southern Europe**

|                     |            |     |                                                    |
|---------------------|------------|-----|----------------------------------------------------|
| Andalusian          | Andalusian | 108 | Casa, Am J. Phys. Anthrop. 131, 539-551, 2006.     |
| Andalusian          | "          | 49  | Plaza, Annals Hum. Genet. 67, 312-328, 2003.       |
| Basque              | Basque     | 61  | Richards, 1996 Am. J. Hum. Genet. 59:185-203.      |
| Basque              | "          | 110 | Cardoso, Am. J. Phys. Anthrop. 145, 480-488, 2011. |
| Basque              | "          | 156 | Richards, Am. J. Hum. Genet. 67, 1251-1276, 2000.  |
| Spanish             | Spanish    | 30  | Richards, Am. J. Hum. Genet. 59:185-203, 1996.     |
| North Eastern Spain | "          | 118 | Crespillo, Int. J. Legal Med. 114, 130-132, 2000.  |
| Catalan             | Catalan    | 46  | Plaza, Annals Hum. Genet. 67, 312-328, 2003.       |
| Portuguese          | Portuguese | 54  | Richards, 1996 Am. J. Hum. Genet. 59:185-203.      |
| Italian             | Italian    | 393 | Turchi, Int. J. Legal Med. 122, 199-204, 2008.     |
| Modern Tuscans      | "          | 322 | Achilli, Am. J. Hum. Genet. 80,759-768, 2007.      |

### **Turkish**

|                |         |    |                                                  |
|----------------|---------|----|--------------------------------------------------|
| Turkish-Ankara | Turkish | 29 | Schonberg, Eur. J. Hum. Genet. 19:988-994, 2011. |
|----------------|---------|----|--------------------------------------------------|

|               |   |     |                                                       |
|---------------|---|-----|-------------------------------------------------------|
| Turkish       | “ | 218 | Richards, Am. J. Hum. Genet. 59:185-203, 2000.        |
| Turkish       | “ | 39  | Nasidze, Proc. R. Soc. LondonB, 268, 1197-1206, 2001. |
| Turkish       | “ | 72  | DiBenedetto, Am. J. Phys. Anth., 114, 144-156, 2001.  |
| Turkish       | “ | 75  | Mergen, J. Genet. 83, 39-47, 2004.                    |
| Turkish-Konya | “ | 50  | Quintana-Murci, Am. J. Hum Genet. 74,827-845, 2004.   |

### **Western Europe**

|        |        |     |                                               |
|--------|--------|-----|-----------------------------------------------|
| French | French | 111 | Cali, Int. J. Legal. Med. 114:229-231, 2001.  |
| French | “      | 210 | Dubut, Eur. J. Hum. Genet. 12, 293-300, 2004. |

### **Ancient**

|                                    |  |    |                                                 |
|------------------------------------|--|----|-------------------------------------------------|
| Bronze Age Etruscans               |  | 23 | Vernesi, Am. J. Hum. Genet. 74, 694-704, 2004.  |
| Bronze Age Iberians                |  | 17 | Sampietro, Annals Hum. Genet. 69,535-548, 2005. |
| Bronze Age Sardinians              |  | 23 | Caramelli, J. Hum. Genet. 122, 327-336, 2007.   |
| Byzantine Period Sagalassos        |  | 53 | Ottoni, J. Hum. Genet. 19, 571-576, 2011.       |
| Medieval Iron Age Nordic           |  | 53 | Melchior, Plos One, 5, e11898,2010              |
| Neolithic LBK Era Germany          |  | 42 | Haak, PLS Biology, 8, 1-16, 2010.               |
| Neolithic Era Hungary              |  | 11 | Guba, J. Hum. Genet. 56, 784-796, 2011.         |
| Neolithic Post LMBG Era<br>Germany |  | 20 | Bramanti, Science 326, 137-140, 2009.           |
| Neolithic Era Scandinavia          |  | 22 | Malstrom, Current Biol, 19, 1758-1762, 2009.    |
| Neolithic Era Iberia               |  | 13 | Gamba, Mol. Ecology, 21, 45-56, 2012.           |
| Neolithic Era Treilles             |  | 29 | Lacan, PNAS, 108, 9788-9791, 2011.              |

### **Greeks**

|                      |  |    |                                                |
|----------------------|--|----|------------------------------------------------|
| Attica               |  | 30 | Vernesi, PNAS,98,13460, 2001                   |
| Various Greeks       |  | 54 | Kouvatsi, Hum. Biol. 73, 855-869, 2001.        |
| Argolis              |  | 15 | Forster, Int. J. Legal Med. 116, 99-108, 2002. |
| EastMacedonia/Thrace |  | 13 | Forster, Int. J. Legal Med. 116, 99-108, 2002. |
| Euboea               |  | 15 | Forster, Int. J. Legal Med. 116, 99-108, 2002. |
| Laconia              |  | 15 | Forster, Int. J. Legal Med. 116, 99-108, 2002. |

|                             |     |                                                                                          |
|-----------------------------|-----|------------------------------------------------------------------------------------------|
| EastMacedonia/Thrace        | 25  | Bosch, <i>Annals Hum. Genet.</i> 70, 459-487, 2006.                                      |
| Macedonia                   | 319 | Irwin, <i>Int J. Legal Med.</i> , 122, 87-89, 2008.                                      |
| Thessaloniki Sarakatsanoi   | 127 | Richards, <i>Am J. Hum. Genet.</i> 67, 1251-1276, 2000.                                  |
| Greece-Chios                | 15  | Forster, <i>Int. J. Legal Med.</i> 116, 99-108, 2002.                                    |
| Crete1                      | 18  | Vernesi, <i>PNAS</i> , 98, 13460, 2001.                                                  |
| Crete2                      | 186 | Villens, Direct submission (ed. Gen Bank). Unpublished, Estonia, Tartu University, 1999. |
| Eastern Crete               | 10  | Forster, <i>Int. J. Legal Med.</i> 116, 99-108, 2002.                                    |
| Heraklion/LasithiPrefecture | 170 | Martinez, <i>J. Phys. Anthropol.</i> , 137, 213-223, 2008.                               |
| LasithiPlateau              | 112 | Martinez, <i>Am. J. Phys. Anthr.</i> 137, 213-223, 2008.                                 |
| Cypriot                     | 91  | Irwin, J. et al, <i>Int J. Legal Med.</i> , 122, 87-89, 2008.                            |

---

**In our analysis, we consolidated individuals from the modern populations to the population groups shown in the second column, by grouping together individuals from the same ethnic group. Sample sizes and references for each of the 135 original populations are shown. Greek populations were not consolidated in order to better explore their affinity to the Minoans.**

## Supplementary Table S5. Average Pairwise Differences.

---

| <b>Population</b>       | <b>Pairwise differences</b> |
|-------------------------|-----------------------------|
| Bronze-Sardinian        | 2.75111                     |
| Bronze-Iberians         | 3.24096                     |
| Corsican                | 3.83114                     |
| Greece-Laconia          | 3.84713                     |
| Portuguese              | 3.85267                     |
| Greece-Euboea           | 3.89308                     |
| Neolithic-Scandinavian  | 3.90312                     |
| German                  | 3.97586                     |
| French                  | 3.991                       |
| Neolithic-Treilles      | 3.99965                     |
| Catalan                 | 4.01067                     |
| Croatian                | 4.03179                     |
| Bosnian                 | 4.03938                     |
| Irish                   | 4.05102                     |
| English                 | 4.06375                     |
| Albanian                | 4.08172                     |
| Neolithic-Iberian       | 4.12684                     |
| Slovenian               | 4.1371                      |
| Crete2                  | 4.1415                      |
| Greece-Sarakatsanoi     | 4.15212                     |
| Greece-Argolis          | 4.15894                     |
| Greece-Attica           | 4.17259                     |
| Crete1                  | 4.20634                     |
| Romanian-Bulgarian      | 4.21024                     |
| Andalusian              | 4.24439                     |
| Bulgarian               | 4.26281                     |
| Aromuns                 | 4.27149                     |
| Slovakian               | 4.27653                     |
| Austrian                | 4.27957                     |
| Greece-Chios            | 4.29069                     |
| BalearicIslands         | 4.29613                     |
| Greece-Macedonia        | 4.30082                     |
| Medieval-IronAge-Nordic | 4.30343                     |
| Spanish                 | 4.3083                      |
| Sardinian               | 4.31216                     |
| Greece-Variou           | 4.32986                     |
| SlavicMacedonian        | 4.33332                     |
| Czech                   | 4.35326                     |

|                             |         |
|-----------------------------|---------|
| Romanian                    | 4.37123 |
| Swiss                       | 4.39357 |
| Greece-EastMacedonia/Thrace | 4.41306 |
| Polish                      | 4.44768 |
| LasithiPlateau              | 4.44937 |
| Russian                     | 4.45643 |
| Neolithic-PostLMBG-German   | 4.49029 |
| Sicilian                    | 4.50864 |
| Adygei                      | 4.52689 |
| Turkish                     | 4.538   |
| Bronze-Etruscans            | 4.54551 |
| Lebanon                     | 4.55165 |
| Cyprus                      | 4.65297 |
| Druze                       | 4.65832 |
| Serbian                     | 4.66225 |
| Neolithic-LBK-German        | 4.69643 |
| Neolithic-Hungarian         | 4.72494 |
| Byzantine-Sagalassos        | 4.74833 |
| Armenian                    | 4.81578 |
| Heraklion-LasithiPrefecture | 4.84504 |
| Syrian                      | 4.85907 |
| Jordanian                   | 4.89009 |
| Kurdish                     | 4.92096 |
| Azeri                       | 5.01008 |
| Caucasus                    | 5.01728 |
| Palestinian                 | 5.01778 |
| Abkhazian                   | 5.04025 |
| EasternCrete                | 5.10694 |
| Italian                     | 5.13788 |
| Iraqi                       | 5.29132 |
| Georgian                    | 5.29356 |
| British                     | 5.42024 |
| Moroccan                    | 5.43876 |
| Iranian                     | 5.4563  |
| Libyan                      | 5.49977 |
| Egypt-Alexandria            | 5.54634 |
| Dubai                       | 5.55729 |
| Basque                      | 5.66452 |
| Tunisian-Coast              | 5.6975  |
| Saudi                       | 5.9212  |
| Yemenite                    | 6.2097  |
| Egyptian                    | 6.49345 |
| Egypt                       | 6.92114 |

|               |         |
|---------------|---------|
| Nubia         | 7.08567 |
| SouthSudanese | 7.81632 |

---

**Average number of pairwise differences between populations in our dataset (in increasing order) between the Minoans, the modern population groups and ancient and Neolithic populations. Computations were performed using Arlequin v3.5.1.3.**



**Supplementary Table S6. Nearest neighbors of the Minoan population in the PCA plot.**

---

| <b>Population</b>           | <b>Distance</b> |
|-----------------------------|-----------------|
| Lasithi Plateau             | 0.002           |
| Serbian                     | 0.002           |
| Bronze-Sardinian            | 0.004           |
| Neolithic-Scandinavian      | 0.006           |
| Adygei                      | 0.007           |
| Neolithic-Treilles          | 0.007           |
| Greece-Euboea               | 0.009           |
| Heraklion-LasithiPrefecture | 0.009           |
| Georgian                    | 0.01            |
| Greece-Chios                | 0.01            |
| Azeri                       | 0.011           |
| Greece-Laconia              | 0.011           |
| Portuguese                  | 0.012           |
| Cyprus                      | 0.012           |
| Sardinian                   | 0.012           |
| Iranian                     | 0.012           |
| Byzantine-Sagalassos        | 0.013           |
| Crete1                      | 0.013           |
| Bronze-Iberians             | 0.014           |
| Spanish                     | 0.015           |
| Greece-Attica               | 0.015           |
| Austrian                    | 0.017           |
| Albanian                    | 0.018           |
| Greece-Argolis              | 0.018           |
| Greece-Various              | 0.018           |
| Italian                     | 0.019           |
| Greece-EastMacedonia/Thrace | 0.019           |
| Caucasus                    | 0.019           |
| Balearic Islands            | 0.02            |
| Corsican                    | 0.021           |
| Medieval-Iron Age-Nordic    | 0.021           |
| Crete2                      | 0.022           |
| German                      | 0.022           |
| Iraqi                       | 0.022           |
| Neolithic-LBK-German        | 0.023           |
| Kurdish                     | 0.023           |
| Aromuns                     | 0.023           |
| Armenian                    | 0.023           |

|                           |       |
|---------------------------|-------|
| Catalan                   | 0.024 |
| Croatian                  | 0.024 |
| Druze                     | 0.024 |
| Palestinian               | 0.025 |
| Syrian                    | 0.026 |
| Jordanian                 | 0.027 |
| Greece-Macedonia          | 0.027 |
| Andalusian                | 0.027 |
| English                   | 0.029 |
| Romanian                  | 0.03  |
| Slovenian                 | 0.031 |
| Basque                    | 0.031 |
| Swiss                     | 0.031 |
| Neolithic-Iberian         | 0.031 |
| Lebanon                   | 0.032 |
| Libyan                    | 0.033 |
| French                    | 0.033 |
| Russian                   | 0.034 |
| Czech                     | 0.035 |
| Bosnian                   | 0.035 |
| Sicilian                  | 0.035 |
| Neolithic-PostLMBG-German | 0.036 |
| Turkish                   | 0.036 |
| Greece-Sarakatsanoi       | 0.036 |
| Polish                    | 0.036 |
| Irish                     | 0.036 |
| Slavic Macedonian         | 0.037 |
| Romanian-Bulgarian        | 0.037 |
| Abkhazian                 | 0.038 |
| Slovakian                 | 0.039 |
| Saudi                     | 0.04  |
| Dubai                     | 0.041 |
| Egypt-Alexandria          | 0.041 |
| Bronze-Etruscans          | 0.042 |
| Bulgarian                 | 0.042 |
| Moroccan                  | 0.046 |
| Tunisian-Coast            | 0.056 |
| Eastern Crete             | 0.057 |
| Neolithic-Hungarian       | 0.073 |
| British                   | 0.083 |
| Yemenite                  | 0.088 |
| Egyptian                  | 0.098 |
| Egypt                     | 0.102 |

|                |       |
|----------------|-------|
| Nubia          | 0.134 |
| South Sudanese | 0.184 |

---

**All populations were sorted with respect to the (Euclidean) distances from the Minoan population in the two- dimensional PCA plot.**

**Supplementary Table S7. Shared Minoan Haplotypes.**

---

| <b>Haplotype</b> | <b>Haplogroup</b> | <b>Population</b>           | <b>Haplotype frequency<br/>(out of 100%)</b> |
|------------------|-------------------|-----------------------------|----------------------------------------------|
| 1                | T2                | Minoans                     | 2.7                                          |
| 1                | T2                | Portuguese                  | 1.85                                         |
| 1                | T2                | German                      | 1.06                                         |
| 1                | T2                | Spanish                     | 0.68                                         |
| 2                | W                 | Minoans                     | 2.7                                          |
| 3                | T5                | Minoans                     | 2.7                                          |
| 4                | T2                | Neolithic-Treilles          | 6.9                                          |
| 4                | T2                | Crete2                      | 5.91                                         |
| 4                | T2                | Croatian                    | 5.17                                         |
| 4                | T2                | Neolithic-Scandinavian      | 4.55                                         |
| 4                | T2                | Lasithi Plateau             | 4.46                                         |
| 4                | T2                | Swiss                       | 3.27                                         |
| 4                | T2                | Polish                      | 2.98                                         |
| 4                | T2                | Slovenian                   | 2.88                                         |
| 4                | T2                | Minoans                     | 2.7                                          |
| 4                | T2                | Greece-EastMacedonia/Thrace | 2.63                                         |
| 4                | T2                | French                      | 2.49                                         |
| 4                | T2                | Neolithic-LBK-German        | 2.38                                         |
| 4                | T2                | Slavic Macedonian           | 2.11                                         |
| 4                | T2                | Irish                       | 2.01                                         |
| 4                | T2                | Adygei                      | 2                                            |
| 4                | T2                | Medieval-Iron Age-Nordic    | 1.89                                         |
| 4                | T2                | Portuguese                  | 1.85                                         |
| 4                | T2                | Greece-Various              | 1.85                                         |
| 4                | T2                | Basque                      | 1.83                                         |
| 4                | T2                | Azeri                       | 1.67                                         |
| 4                | T2                | English                     | 1.65                                         |
| 4                | T2                | Russian                     | 1.49                                         |
| 4                | T2                | Libyan                      | 1.49                                         |
| 4                | T2                | Albanian                    | 1.19                                         |
| 4                | T2                | Czech                       | 1.12                                         |
| 4                | T2                | German                      | 1.06                                         |
| 4                | T2                | Corsican                    | 1.01                                         |
| 4                | T2                | Italian                     | 0.98                                         |

|   |    |                             |      |
|---|----|-----------------------------|------|
| 4 | T2 | Palestinian                 | 0.85 |
| 4 | T2 | Austrian                    | 0.85 |
| 4 | T2 | Syrian                      | 0.85 |
| 4 | T2 | Sicilian                    | 0.71 |
| 4 | T2 | Bosnian                     | 0.68 |
| 4 | T2 | Spanish                     | 0.68 |
| 4 | T2 | Iranian                     | 0.6  |
| 4 | T2 | Bulgarian                   | 0.58 |
| 4 | T2 | Slovakian                   | 0.53 |
| 4 | T2 | Romanian-Bulgarian          | 0.43 |
| 4 | T2 | Georgian                    | 0.38 |
| 4 | T2 | Sardinian                   | 0.33 |
| 4 | T2 | Greece-Macedonia            | 0.31 |
| 5 | T2 | Greece-Chios                | 6.67 |
| 5 | T2 | Greece-Argolis              | 6.67 |
| 5 | T2 | British                     | 6.52 |
| 5 | T2 | Minoans                     | 5.41 |
| 5 | T2 | Caucasus                    | 3.51 |
| 5 | T2 | Basque                      | 3.06 |
| 5 | T2 | Greece-EastMacedonia/Thrace | 2.63 |
| 5 | T2 | Swiss                       | 2.61 |
| 5 | T2 | Neolithic-LBK-German        | 2.38 |
| 5 | T2 | Aromuns                     | 2.29 |
| 5 | T2 | Adygei                      | 2    |
| 5 | T2 | Kurdish                     | 1.88 |
| 5 | T2 | Austrian                    | 1.71 |
| 5 | T2 | Slovakian                   | 1.34 |
| 5 | T2 | Greece-Macedonia            | 1.25 |
| 5 | T2 | Turkish                     | 1.24 |
| 5 | T2 | Georgian                    | 1.14 |
| 5 | T2 | Sicilian                    | 1.06 |
| 5 | T2 | Armenian                    | 1.05 |
| 5 | T2 | Russian                     | 1    |
| 5 | T2 | Slovenian                   | 0.96 |
| 5 | T2 | Palestinian                 | 0.85 |
| 5 | T2 | Syrian                      | 0.85 |
| 5 | T2 | Azeri                       | 0.83 |
| 5 | T2 | English                     | 0.83 |
| 5 | T2 | Greece-Sarakatsanoi         | 0.79 |
| 5 | T2 | Iraqi                       | 0.69 |
| 5 | T2 | Jordanian                   | 0.69 |
| 5 | T2 | Sardinian                   | 0.66 |
| 5 | T2 | Iranian                     | 0.6  |

|    |    |                             |      |
|----|----|-----------------------------|------|
| 5  | T2 | Heraklion-LasithiPrefecture | 0.59 |
| 5  | T2 | Lebanon                     | 0.55 |
| 5  | T2 | Crete2                      | 0.54 |
| 5  | T2 | Polish                      | 0.46 |
| 5  | T2 | Italian                     | 0.42 |
| 5  | T2 | Bulgarian                   | 0.35 |
| 5  | T2 | Irish                       | 0.33 |
| 5  | T2 | French                      | 0.31 |
| 6  | T3 | Minoans                     | 2.7  |
| 6  | T3 | Corsican                    | 1.01 |
| 6  | T3 | Sardinian                   | 0.99 |
| 6  | T3 | Palestinian                 | 0.85 |
| 6  | T3 | Jordanian                   | 0.69 |
| 6  | T3 | Aromuns                     | 0.57 |
| 6  | T3 | German                      | 0.53 |
| 6  | T3 | Romanian-Bulgarian          | 0.43 |
| 6  | T3 | Italian                     | 0.42 |
| 6  | T3 | Turkish                     | 0.41 |
| 6  | T3 | Saudi                       | 0.36 |
| 6  | T3 | French                      | 0.31 |
| 6  | T3 | Iranian                     | 0.12 |
| 7  | T1 | Minoans                     | 2.7  |
| 7  | T1 | Heraklion-LasithiPrefecture | 0.59 |
| 8  | I5 | Minoans                     | 8.11 |
| 8  | I5 | Bosnian                     | 2.38 |
| 8  | I5 | Druze                       | 1.12 |
| 8  | I5 | Slovenian                   | 0.96 |
| 8  | I5 | Romanian-Bulgarian          | 0.43 |
| 8  | I5 | Sardinian                   | 0.33 |
| 8  | I5 | Lebanon                     | 0.28 |
| 8  | I5 | Bulgarian                   | 0.23 |
| 8  | I5 | Iranian                     | 0.12 |
| 9  | X  | Minoans                     | 2.7  |
| 10 | H  | Minoans                     | 2.7  |
| 10 | H  | Armenian                    | 2.09 |
| 10 | H  | Romanian                    | 0.95 |
| 10 | H  | Syrian                      | 0.85 |
| 10 | H  | Spanish                     | 0.68 |
| 10 | H  | Andalusian                  | 0.64 |
| 10 | H  | French                      | 0.62 |
| 10 | H  | Lebanon                     | 0.55 |
| 10 | H  | Iraqi                       | 0.46 |
| 10 | H  | English                     | 0.41 |

|    |   |                             |       |
|----|---|-----------------------------|-------|
| 10 | H | Italian                     | 0.14  |
| 11 | K | Neolithic-Iberian           | 23.08 |
| 11 | K | Cyprus                      | 9.89  |
| 11 | K | Minoans                     | 8.11  |
| 11 | K | Neolithic-Treilles          | 6.9   |
| 11 | K | Greece-Argolis              | 6.67  |
| 11 | K | Bronze-Iberians             | 5.88  |
| 11 | K | Byzantine-Sagalassos        | 5.66  |
| 11 | K | Neolithic-PostLMBG-German   | 5     |
| 11 | K | French                      | 4.98  |
| 11 | K | Neolithic-LBK-German        | 4.76  |
| 11 | K | Irish                       | 4.68  |
| 11 | K | Lasithi Plateau             | 4.46  |
| 11 | K | German                      | 4.23  |
| 11 | K | Druze                       | 4.21  |
| 11 | K | Kurdish                     | 3.76  |
| 11 | K | Portuguese                  | 3.7   |
| 11 | K | Greece-Various              | 3.7   |
| 11 | K | Abkhazian                   | 3.7   |
| 11 | K | Armenian                    | 3.66  |
| 11 | K | Lebanon                     | 3.58  |
| 11 | K | Heraklion-LasithiPrefecture | 3.53  |
| 11 | K | Italian                     | 3.5   |
| 11 | K | Greece-Attica               | 3.33  |
| 11 | K | English                     | 3.31  |
| 11 | K | Andalusian                  | 3.18  |
| 11 | K | Bosnian                     | 3.06  |
| 11 | K | Sicilian                    | 2.83  |
| 11 | K | Greece-EastMacedonia/Thrace | 2.63  |
| 11 | K | Swiss                       | 2.61  |
| 11 | K | Romanian-Bulgarian          | 2.58  |
| 11 | K | Russian                     | 2.49  |
| 11 | K | Albanian                    | 2.38  |
| 11 | K | Czech                       | 2.25  |
| 11 | K | British                     | 2.17  |
| 11 | K | Crete2                      | 2.15  |
| 11 | K | Egypt                       | 2.13  |
| 11 | K | Turkish                     | 2.07  |
| 11 | K | Sardinian                   | 1.98  |
| 11 | K | Romanian                    | 1.9   |
| 11 | K | Medieval-Iron Age-Nordic    | 1.89  |
| 11 | K | Bulgarian                   | 1.87  |
| 11 | K | Libyan                      | 1.86  |

|    |    |                     |      |
|----|----|---------------------|------|
| 11 | K  | Moroccan            | 1.82 |
| 11 | K  | Palestinian         | 1.71 |
| 11 | K  | Syrian              | 1.69 |
| 11 | K  | Slavic Macedonian   | 1.69 |
| 11 | K  | Greece-Sarakatsanoi | 1.57 |
| 11 | K  | Greece-Macedonia    | 1.57 |
| 11 | K  | Basque              | 1.53 |
| 11 | K  | Jordanian           | 1.38 |
| 11 | K  | Polish              | 1.38 |
| 11 | K  | Slovakian           | 1.34 |
| 11 | K  | Iranian             | 1.19 |
| 11 | K  | Aromuns             | 1.14 |
| 11 | K  | Egypt-Alexandria    | 1.08 |
| 11 | K  | Corsican            | 1.01 |
| 11 | K  | Slovenian           | 0.96 |
| 11 | K  | Iraqi               | 0.92 |
| 11 | K  | Saudi               | 0.9  |
| 11 | K  | Austrian            | 0.85 |
| 11 | K  | Azeri               | 0.83 |
| 11 | K  | Dubai               | 0.81 |
| 11 | K  | Georgian            | 0.76 |
| 11 | K  | Spanish             | 0.68 |
| 12 | H5 | Slovenian           | 7.69 |
| 12 | H5 | British             | 7.61 |
| 12 | H5 | Crete1              | 5.56 |
| 12 | H5 | Bosnian             | 5.1  |
| 12 | H5 | Catalan             | 4.35 |
| 12 | H5 | Aromuns             | 4    |
| 12 | H5 | Greece-Various      | 3.7  |
| 12 | H5 | Romanian-Bulgarian  | 3.43 |
| 12 | H5 | Greece-Attica       | 3.33 |
| 12 | H5 | Crete2              | 3.23 |
| 12 | H5 | Greece-Sarakatsanoi | 3.15 |
| 12 | H5 | Tunisian-Coast      | 3.13 |
| 12 | H5 | Romanian            | 2.86 |
| 12 | H5 | Czech               | 2.81 |
| 12 | H5 | Minoans             | 2.7  |
| 12 | H5 | French              | 2.49 |
| 12 | H5 | Russian             | 2.49 |
| 12 | H5 | Sicilian            | 2.47 |
| 12 | H5 | Bulgarian           | 2.46 |
| 12 | H5 | Albanian            | 2.38 |
| 12 | H5 | Cyprus              | 2.2  |



|    |    |                             |      |
|----|----|-----------------------------|------|
| 12 | H5 | Slavic Macedonian           | 2.11 |
| 12 | H5 | Polish                      | 2.06 |
| 12 | H5 | Medieval-Iron Age-Nordic    | 1.89 |
| 12 | H5 | Greece-Macedonia            | 1.88 |
| 12 | H5 | Slovakian                   | 1.87 |
| 12 | H5 | Turkish                     | 1.86 |
| 12 | H5 | Basque                      | 1.83 |
| 12 | H5 | Italian                     | 1.82 |
| 12 | H5 | Lasithi Plateau             | 1.79 |
| 12 | H5 | Heraklion-LasithiPrefecture | 1.76 |
| 12 | H5 | Croatian                    | 1.72 |
| 12 | H5 | Palestinian                 | 1.71 |
| 12 | H5 | Iraqi                       | 1.62 |
| 12 | H5 | German                      | 1.59 |
| 12 | H5 | Spanish                     | 1.35 |
| 12 | H5 | Swiss                       | 1.31 |
| 12 | H5 | English                     | 1.24 |
| 12 | H5 | Armenian                    | 1.05 |
| 12 | H5 | Sardinian                   | 0.99 |
| 12 | H5 | Syrian                      | 0.85 |
| 12 | H5 | Azeri                       | 0.83 |
| 12 | H5 | Lebanon                     | 0.83 |
| 12 | H5 | Jordanian                   | 0.69 |
| 12 | H5 | Irish                       | 0.67 |
| 12 | H5 | Kurdish                     | 0.47 |
| 12 | H5 | Georgian                    | 0.38 |
| 12 | H5 | Libyan                      | 0.37 |
| 12 | H5 | Saudi                       | 0.36 |
| 12 | H5 | Egypt-Alexandria            | 0.36 |
| 12 | H5 | Iranian                     | 0.24 |
| 13 | HV | Neolithic-LBK-German        | 9.52 |
| 13 | HV | Neolithic-Scandinavian      | 9.09 |
| 13 | HV | Minoans                     | 8.11 |
| 13 | HV | Lasithi Plateau             | 8.04 |
| 13 | HV | Greece-Laconia              | 6.67 |
| 13 | HV | Greece-Argolis              | 6.67 |
| 13 | HV | Albanian                    | 5.95 |
| 13 | HV | Serbian                     | 5.56 |
| 13 | HV | Greece-Various              | 5.56 |
| 13 | HV | Greece-EastMacedonia/Thrace | 5.26 |
| 13 | HV | Bosnian                     | 5.1  |
| 13 | HV | Romanian                    | 4.76 |
| 13 | HV | Bronze-Sardinian            | 4.35 |

|    |    |                              |      |
|----|----|------------------------------|------|
| 13 | HV | Bronze-Etruscans             | 4.35 |
| 13 | HV | German                       | 4.23 |
| 13 | HV | Aromuns                      | 4    |
| 13 | HV | Slavic Macedonian            | 3.8  |
| 13 | HV | Abkhazian                    | 3.7  |
| 13 | HV | Heraklion-Lasithi Prefecture | 3.53 |
| 13 | HV | Bulgarian                    | 3.51 |
| 13 | HV | Croatian                     | 3.45 |
| 13 | HV | Corsican                     | 3.03 |
| 13 | HV | Romanian-Bulgarian           | 3    |
| 13 | HV | Sardinian                    | 2.97 |
| 13 | HV | Greece-Macedonia             | 2.82 |
| 13 | HV | Georgian                     | 2.65 |
| 13 | HV | Iraqi                        | 2.54 |
| 13 | HV | French                       | 2.49 |
| 13 | HV | Greece-Sarakatsanoi          | 2.36 |
| 13 | HV | Kurdish                      | 2.35 |
| 13 | HV | Italian                      | 2.24 |
| 13 | HV | Catalan                      | 2.17 |
| 13 | HV | British                      | 2.17 |
| 13 | HV | Jordanian                    | 2.07 |
| 13 | HV | Spanish                      | 2.03 |
| 13 | HV | Adygei                       | 2    |
| 13 | HV | Slovenian                    | 1.92 |
| 13 | HV | Medieval-Iron Age-Nordic     | 1.89 |
| 13 | HV | Slovakian                    | 1.87 |
| 13 | HV | Turkish                      | 1.86 |
| 13 | HV | Portuguese                   | 1.85 |
| 13 | HV | Polish                       | 1.83 |
| 13 | HV | Moroccan                     | 1.82 |
| 13 | HV | Sicilian                     | 1.77 |
| 13 | HV | Caucasus                     | 1.75 |
| 13 | HV | Austrian                     | 1.71 |
| 13 | HV | Syrian                       | 1.69 |
| 13 | HV | Czech                        | 1.69 |
| 13 | HV | Azeri                        | 1.67 |
| 13 | HV | Swiss                        | 1.31 |
| 13 | HV | Andalusian                   | 1.27 |
| 13 | HV | Basque                       | 1.22 |
| 13 | HV | Iranian                      | 1.19 |
| 13 | HV | Cyprus                       | 1.1  |
| 13 | HV | Armenian                     | 1.05 |
| 13 | HV | Russian                      | 1    |

|    |    |                     |       |
|----|----|---------------------|-------|
| 13 | HV | Palestinian         | 0.85  |
| 13 | HV | Lebanon             | 0.83  |
| 13 | HV | English             | 0.83  |
| 13 | HV | Saudi               | 0.72  |
| 13 | HV | Irish               | 0.67  |
| 13 | HV | Druze               | 0.56  |
| 14 | H  | Bronze-Sardinian    | 47.83 |
| 14 | H  | Catalan             | 28.26 |
| 14 | H  | Neolithic-Hungarian | 27.27 |
| 14 | H  | Portuguese          | 25.93 |
| 14 | H  | British             | 25    |
| 14 | H  | Sardinian           | 22.44 |
| 14 | H  | Crete1              | 22.22 |
| 14 | H  | Minoans             | 21.62 |
| 14 | H  | Balearic Islands    | 20.9  |
| 14 | H  | Neolithic-Treilles  | 20.69 |
| 14 | H  | Basque              | 20.49 |
| 14 | H  | Corsican            | 20.2  |
| 14 | H  | Greece-Euboea       | 20    |
| 14 | H  | Austrian            | 19.66 |
| 14 | H  | Andalusian          | 19.11 |
| 14 | H  | Irish               | 18.73 |
| 14 | H  | Moroccan            | 18.18 |
| 14 | H  | Polish              | 16.97 |
| 14 | H  | Albanian            | 16.67 |
| 14 | H  | English             | 16.53 |
| 14 | H  | Spanish             | 16.22 |
| 14 | H  | Adygei              | 16    |
| 14 | H  | Sicilian            | 15.9  |
| 14 | H  | French              | 15.58 |
| 14 | H  | Italian             | 15.1  |
| 14 | H  | Czech               | 14.61 |
| 14 | H  | Lebanon             | 14.6  |
| 14 | H  | Lasithi Plateau     | 14.29 |
| 14 | H  | German              | 14.29 |
| 14 | H  | Crete2              | 13.98 |
| 14 | H  | Slovakian           | 13.9  |
| 14 | H  | Swiss               | 13.73 |
| 14 | H  | Turkish             | 13.66 |
| 14 | H  | Slovenian           | 13.46 |
| 14 | H  | Russian             | 13.43 |
| 14 | H  | Greece-Attica       | 13.33 |
| 14 | H  | Greece-Argolis      | 13.33 |

|    |   |                             |       |
|----|---|-----------------------------|-------|
| 14 | H | Greece-EastMacedonia/Thrace | 13.16 |
| 14 | H | Romanian                    | 12.38 |
| 14 | H | Slavic Macedonian           | 12.24 |
| 14 | H | Heraklion-LasithiPrefecture | 11.76 |
| 14 | H | Bosnian                     | 11.56 |
| 14 | H | Bulgarian                   | 11.46 |
| 14 | H | Jordanian                   | 11.03 |
| 14 | H | Tunisian-Coast              | 10.94 |
| 14 | H | Kurdish                     | 10.33 |
| 14 | H | Romanian-Bulgarian          | 10.3  |
| 14 | H | Greece-Sarakatsanoi         | 10.24 |
| 14 | H | Druze                       | 10.11 |
| 14 | H | Greece-Macedonia            | 10.03 |
| 14 | H | Eastern Crete               | 10    |
| 14 | H | Neolithic-LBK-German        | 9.52  |
| 14 | H | Greece-Various              | 9.26  |
| 14 | H | Aromuns                     | 9.14  |
| 14 | H | Cyprus                      | 8.79  |
| 14 | H | Caucasus                    | 8.77  |
| 14 | H | Croatian                    | 8.62  |
| 14 | H | Iranian                     | 8.35  |
| 14 | H | Libyan                      | 8.18  |
| 14 | H | Armenian                    | 7.85  |
| 14 | H | Neolithic-Iberian           | 7.69  |
| 14 | H | Syrian                      | 7.63  |
| 14 | H | Georgian                    | 7.58  |
| 14 | H | Medieval-Iron Age-Nordic    | 7.55  |
| 14 | H | Byzantine-Sagalassos        | 7.55  |
| 14 | H | Egypt-Alexandria            | 6.86  |
| 14 | H | Palestinian                 | 6.84  |
| 14 | H | Greece-Laconia              | 6.67  |
| 14 | H | Greece-Chios                | 6.67  |
| 14 | H | Bronze-Iberians             | 5.88  |
| 14 | H | Serbian                     | 5.56  |
| 14 | H | Egypt                       | 5.32  |
| 14 | H | Egyptian                    | 5.26  |
| 14 | H | Neolithic-PostLMBG-German   | 5     |
| 14 | H | Iraqi                       | 4.85  |
| 14 | H | Neolithic-Scandinavian      | 4.55  |
| 14 | H | Bronze-Etruscans            | 4.35  |
| 14 | H | Azeri                       | 4.17  |
| 14 | H | Abkhazian                   | 3.7   |
| 14 | H | Dubai                       | 3.63  |

|    |     |                    |      |
|----|-----|--------------------|------|
| 14 | H   | Saudi              | 2.71 |
| 14 | H   | Yemenite           | 2.61 |
| 14 | H   | Nubia              | 1.2  |
| 15 | H   | Minoans            | 2.7  |
| 16 | H   | Minoans            | 2.7  |
| 16 | H   | Spanish            | 0.68 |
| 16 | H   | Crete2             | 0.54 |
| 16 | H   | Dubai              | 0.4  |
| 16 | H   | Libyan             | 0.37 |
| 16 | H   | Italian            | 0.28 |
| 16 | H   | Iranian            | 0.12 |
| 17 | H   | Minoans            | 2.7  |
| 17 | H   | Corsican           | 1.01 |
| 17 | H   | Basque             | 0.61 |
| 17 | H   | Polish             | 0.23 |
| 17 | H   | Bulgarian          | 0.12 |
| 18 | U5a | Adygei             | 4    |
| 18 | U5a | Minoans            | 2.7  |
| 18 | U5a | Croatian           | 1.72 |
| 18 | U5a | Austrian           | 0.85 |
| 18 | U5a | Druze              | 0.84 |
| 18 | U5a | Azeri              | 0.83 |
| 18 | U5a | Georgian           | 0.76 |
| 18 | U5a | Jordanian          | 0.69 |
| 18 | U5a | Lebanon            | 0.55 |
| 18 | U5a | Slovakian          | 0.53 |
| 18 | U5a | Romanian-Bulgarian | 0.43 |
| 18 | U5a | Slavic Macedonian  | 0.42 |
| 18 | U5a | Greece-Macedonia   | 0.31 |
| 18 | U5a | Iranian            | 0.12 |
| 19 | U   | Minoans            | 2.7  |
| 20 | K   | Minoans            | 8.11 |
| 20 | K   | Turkish            | 0.21 |
| 21 | J2  | Minoans            | 2.7  |

---

The first column of the table indicates the number of the haplotype (out of 21 distinct haplotypes observed in the 37 Minoan samples), the second column indicates the haplogroup, the third column indicates a population where the haplotype appears, and the fourth column indicates the haplotype frequency in the respective population (out of 100%).
